# Supplementary material for: Synthesis of new porphyrinoid dyads linked with a butenyne bridge via the Sonogashira reaction
Source: Royal Society of Chemistry journal article supplement (doi:10.1039/d4nj02811b), 2024-01-01
Supplement: d4nj02811b1.pdf [file d4nj02811b1.pdf]

## Supplementary Material

# Synthesis of the new porphyrinoid dyads linked with butenyne bridge via Sonogashira reaction

Alena O. Shkirdova, Vladimir S. Tyurin\*, Andrey Y. Chernyadyev, Ilya A. Zamilatskov\*

A.N. Frumkin Institute of Physical Chemistry and Electrochemistry, Russian Academy of Sciences, 119071 Moscow, Russia

\* Correspondence: [tv@org.chem.msu.ru](mailto:tv@org.chem.msu.ru) joz@mail.ru

### Table of Contents

|                             |     |
|-----------------------------|-----|
| NMR spectra                 | S2  |
| Mass spectra                | S9  |
| Photophysical data          | S13 |
| Results of DFT calculations | S16 |



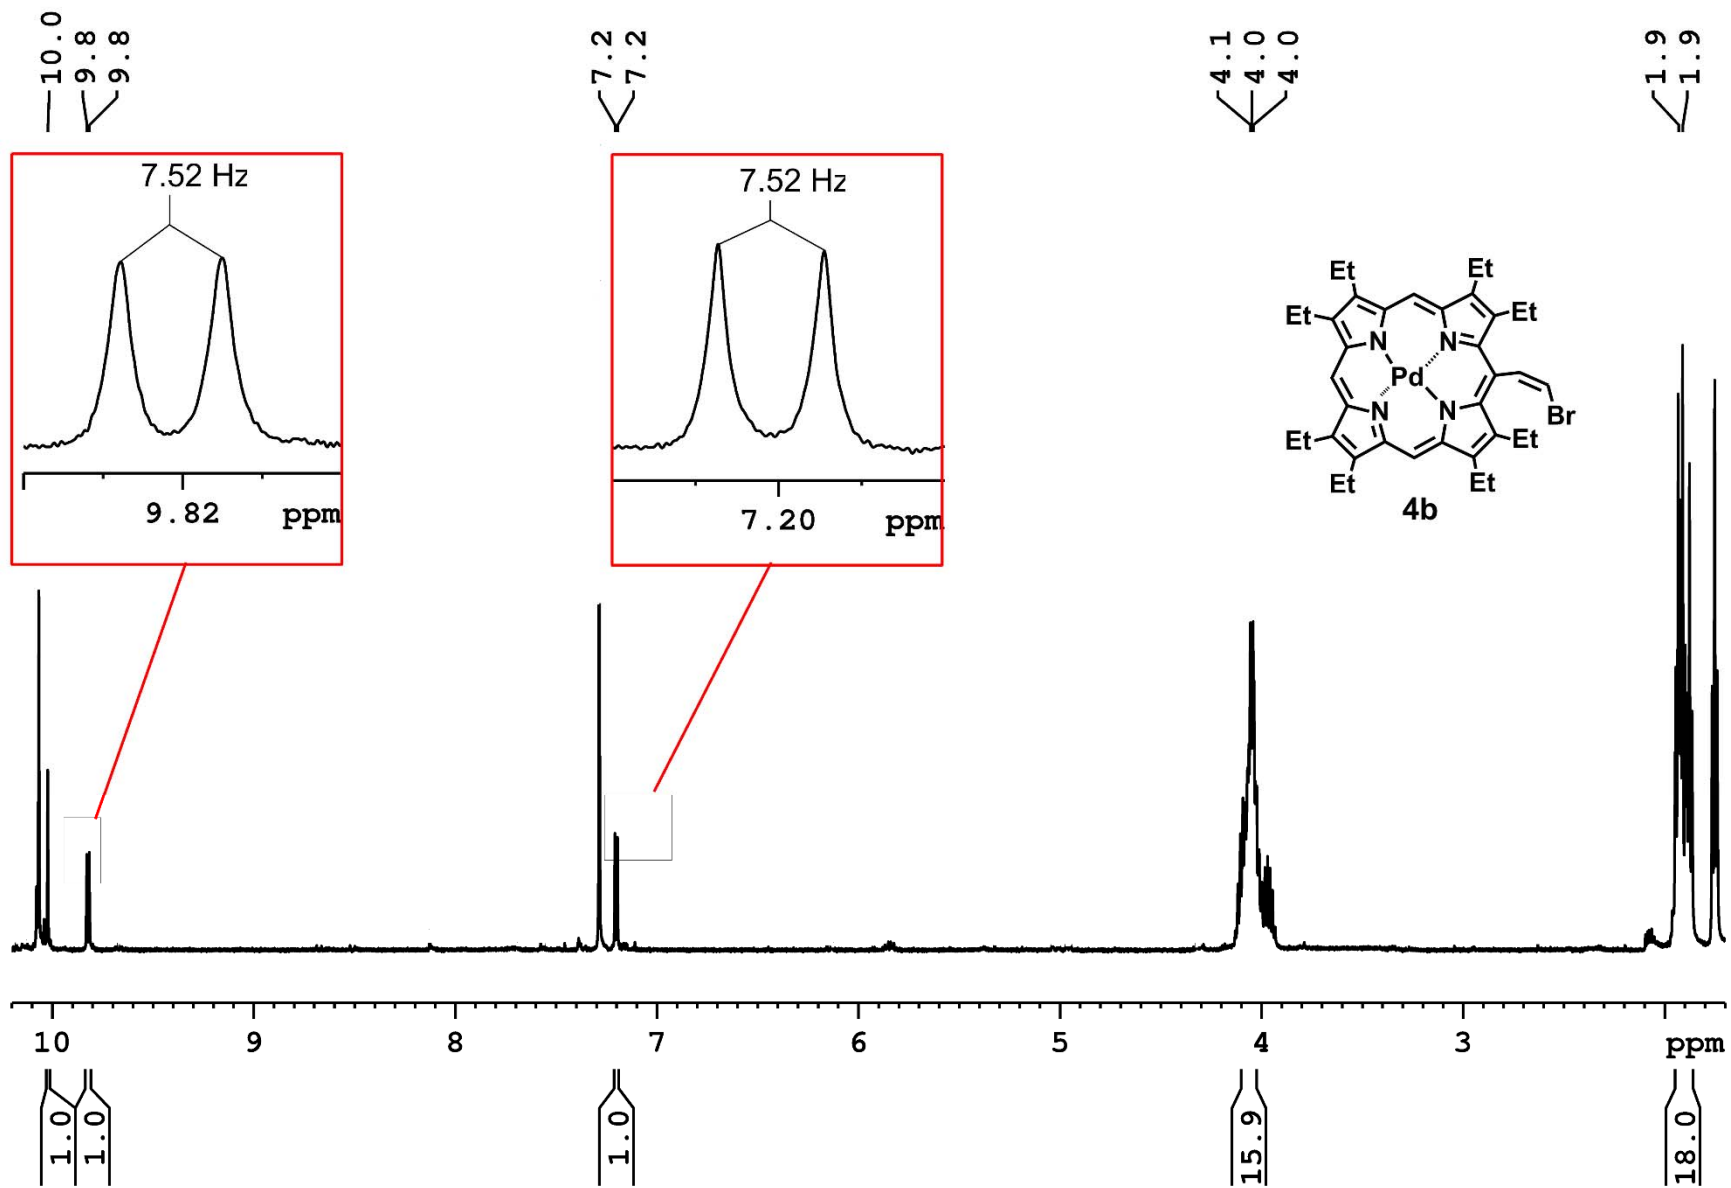

Figure S2.  $^1\text{H}$  NMR spectrum of the **4b**.

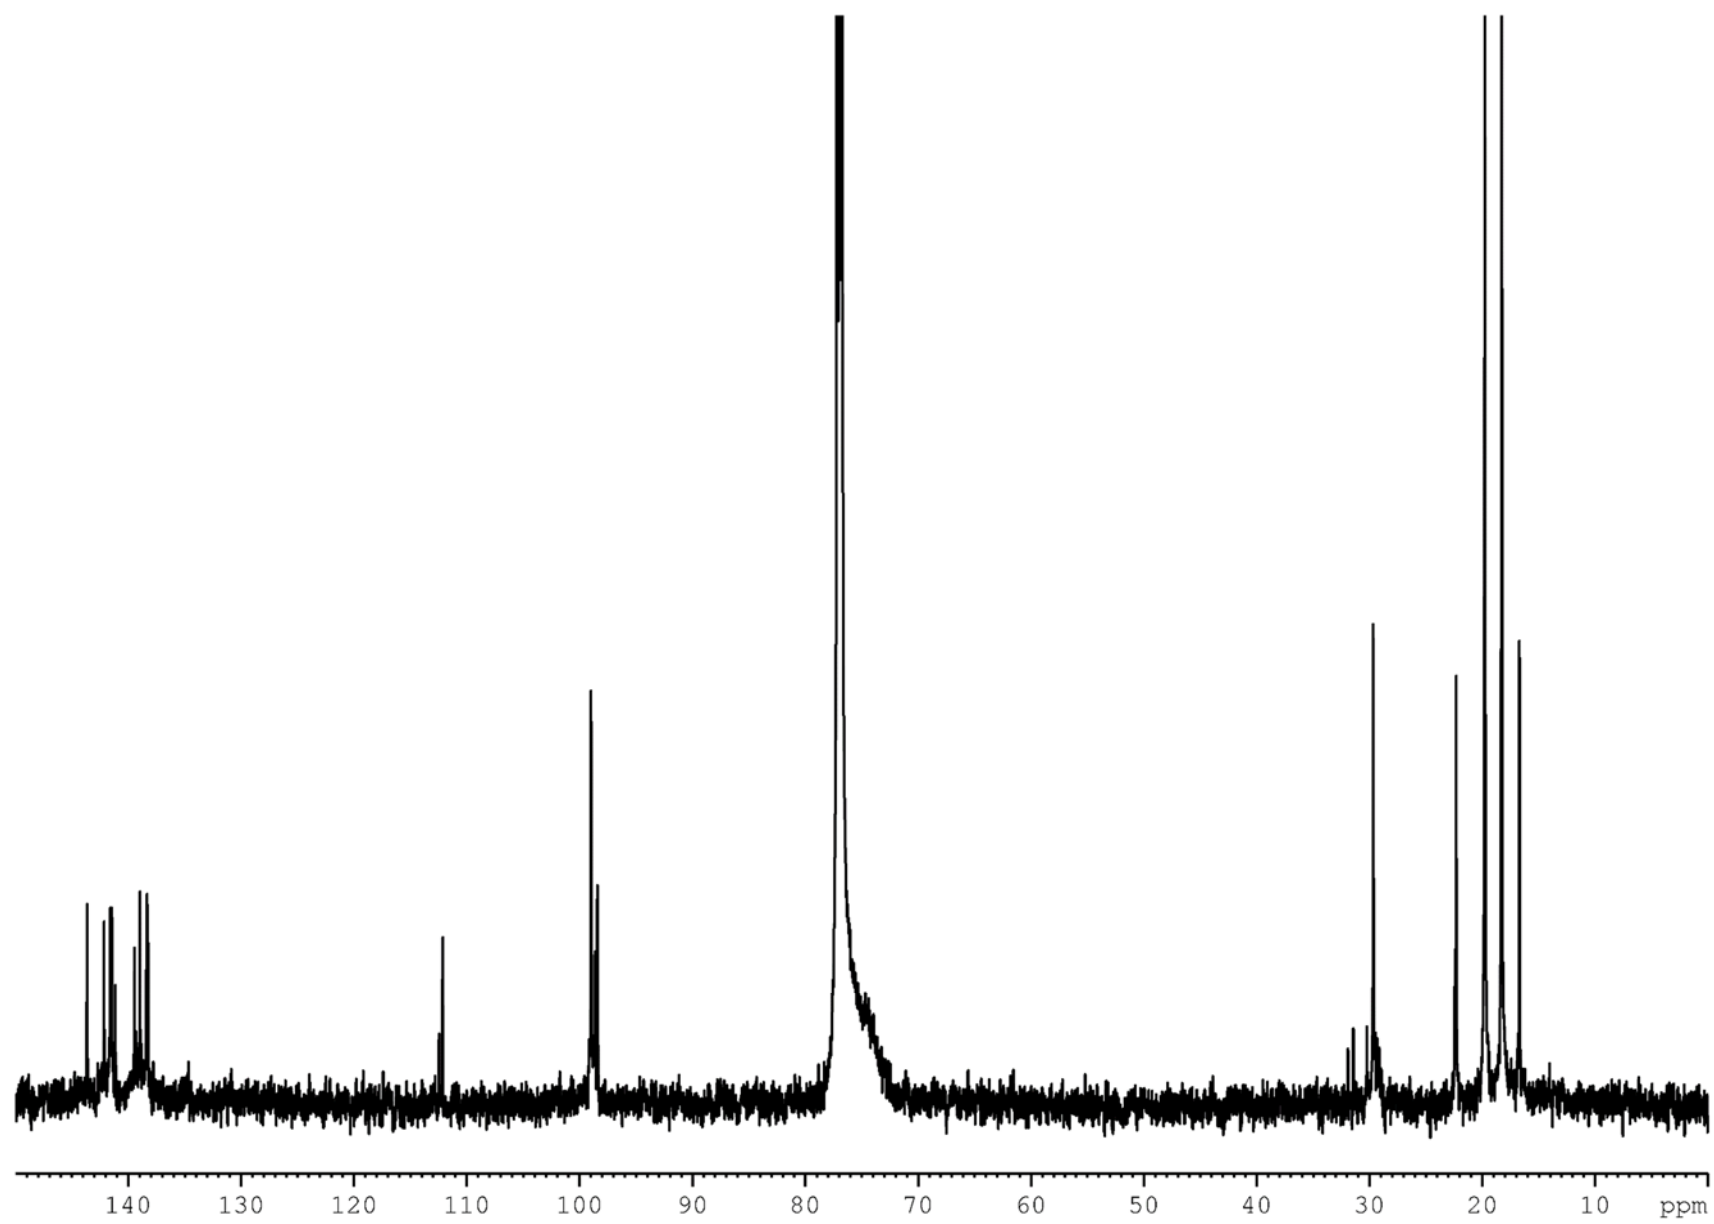

Figure S3.  $^{13}\text{C}$  NMR spectrum of the 4a.

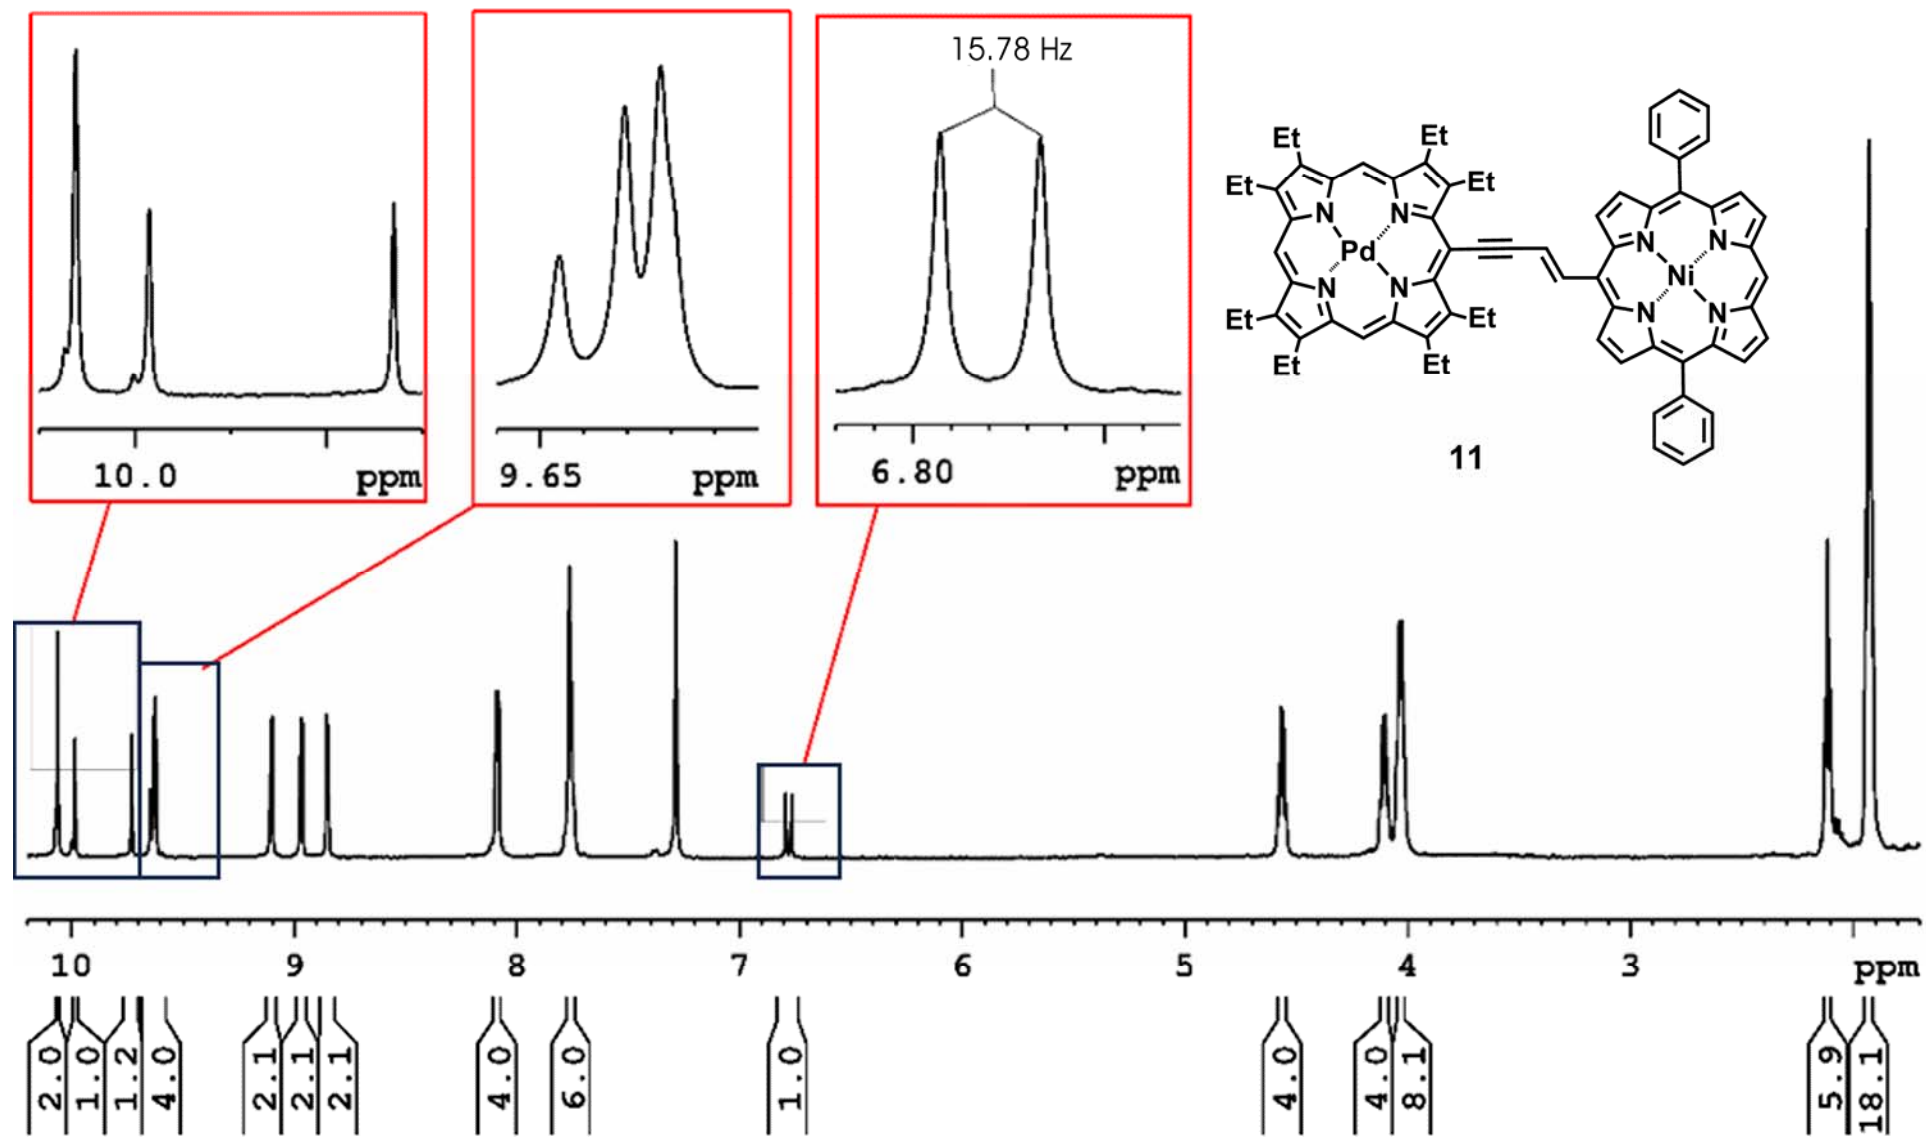

Figure S4. <sup>1</sup>H NMR spectrum of the dyad 11.

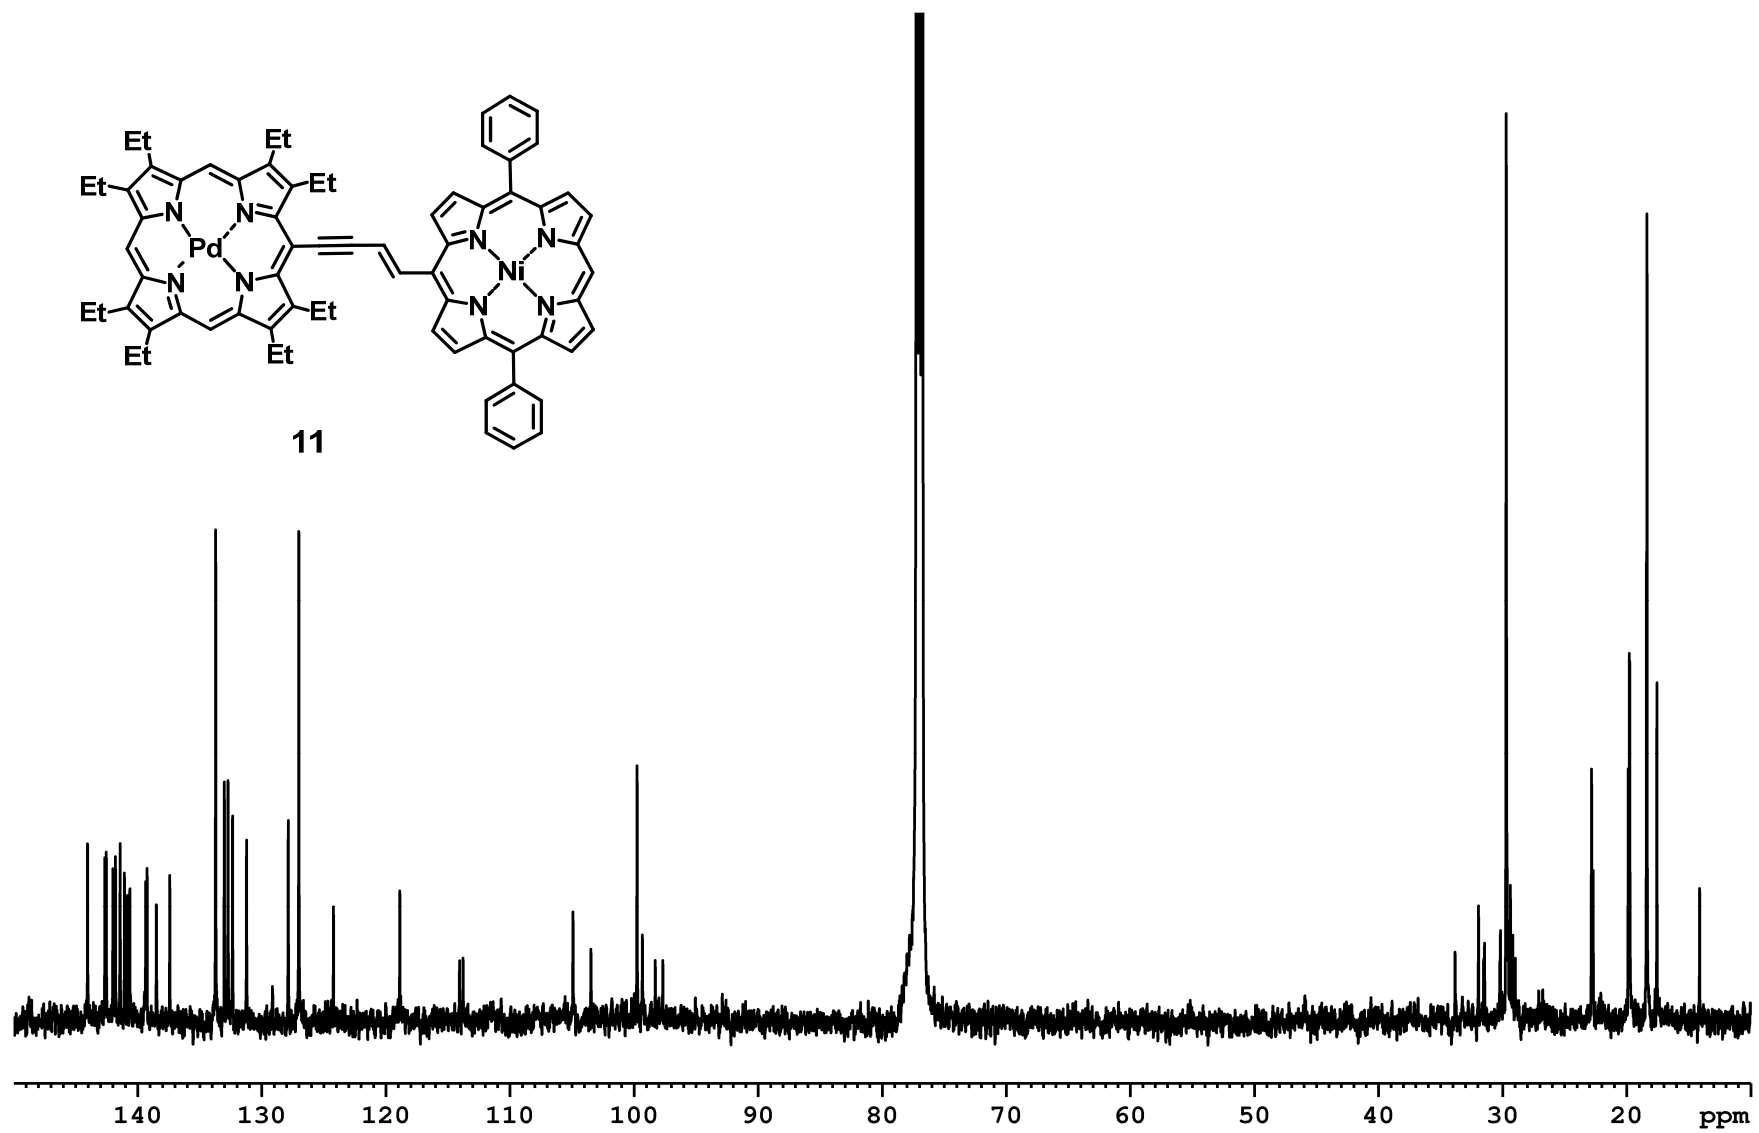

Figure S5. <sup>13</sup>C NMR spectrum of the dyad **11**.

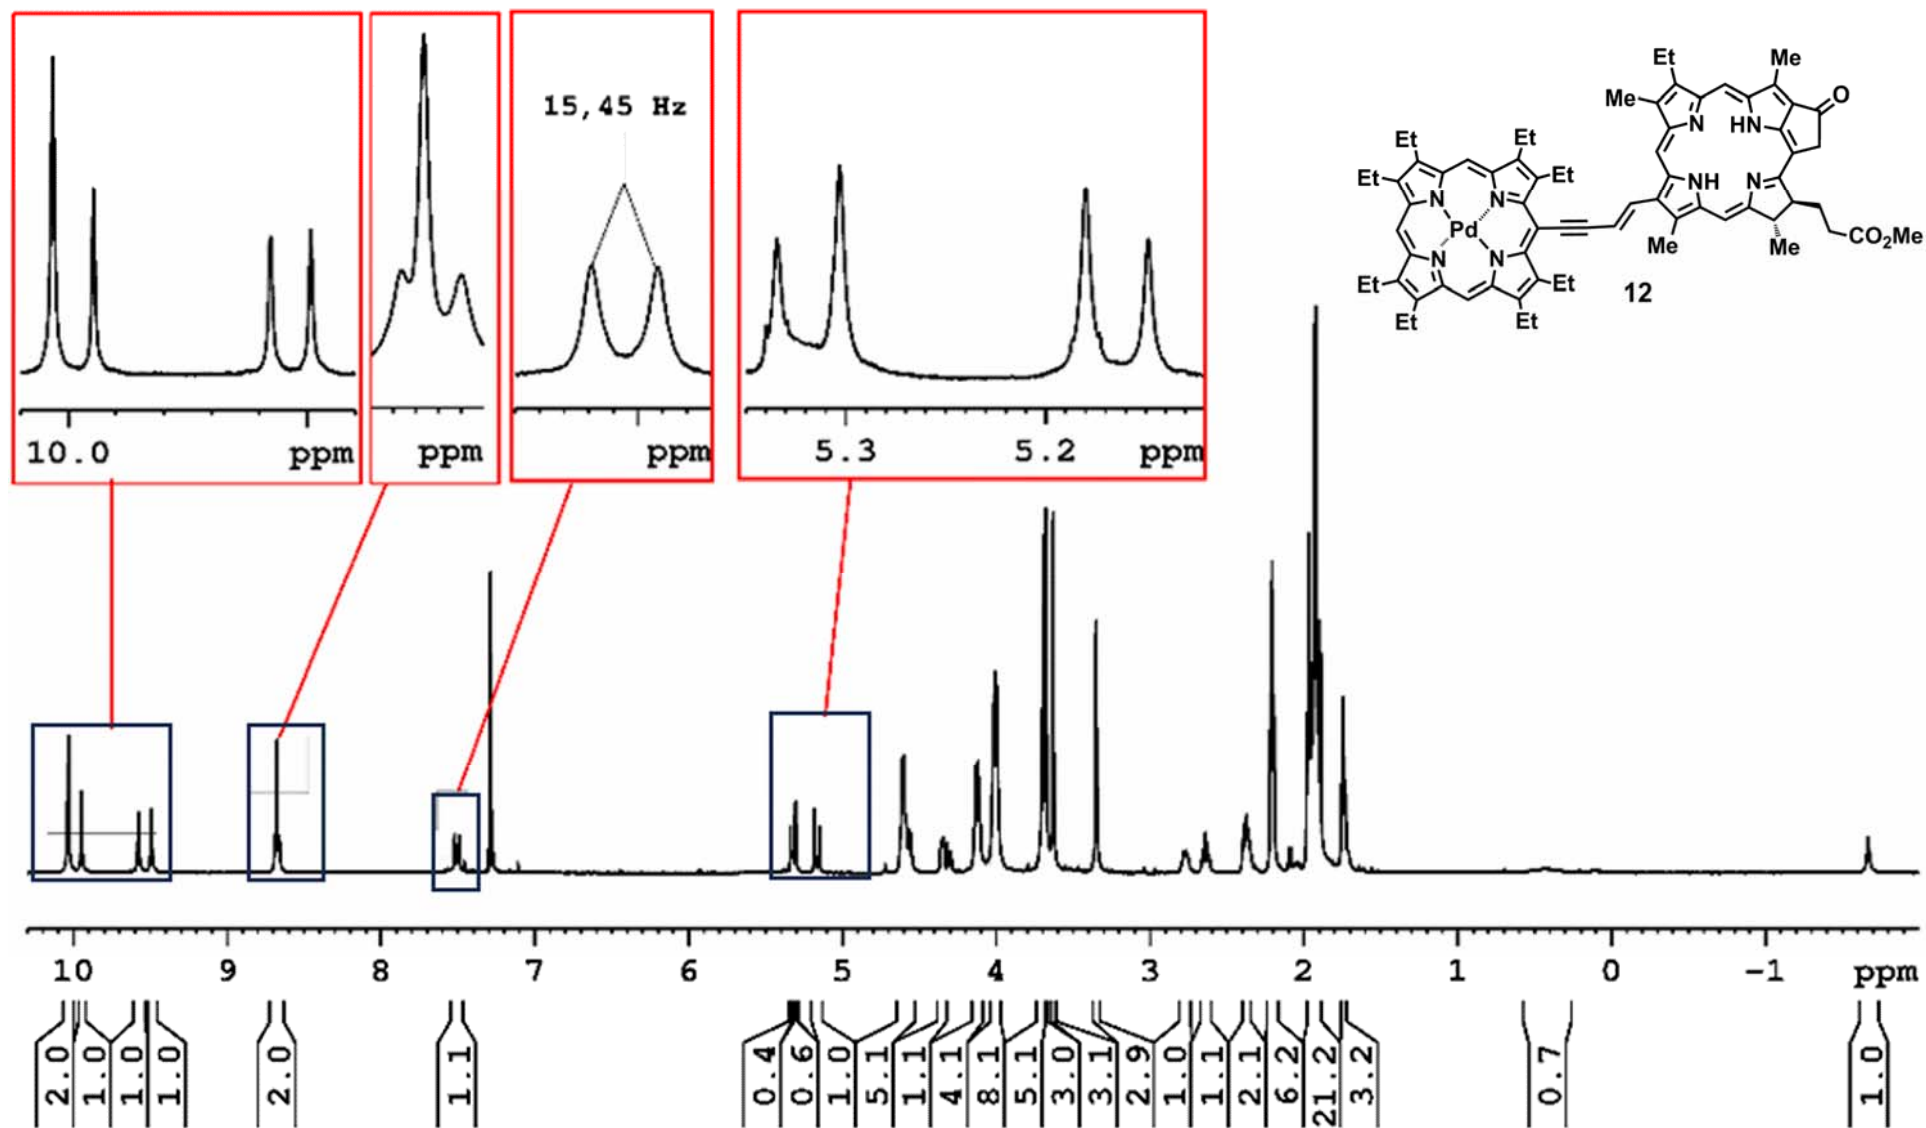

Figure S6. <sup>1</sup>H NMR spectrum of the dyad 12.

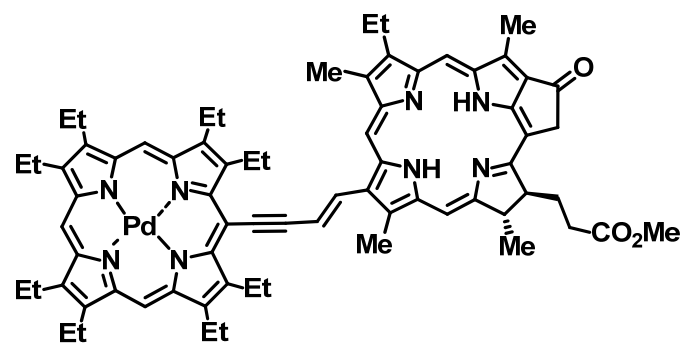

12

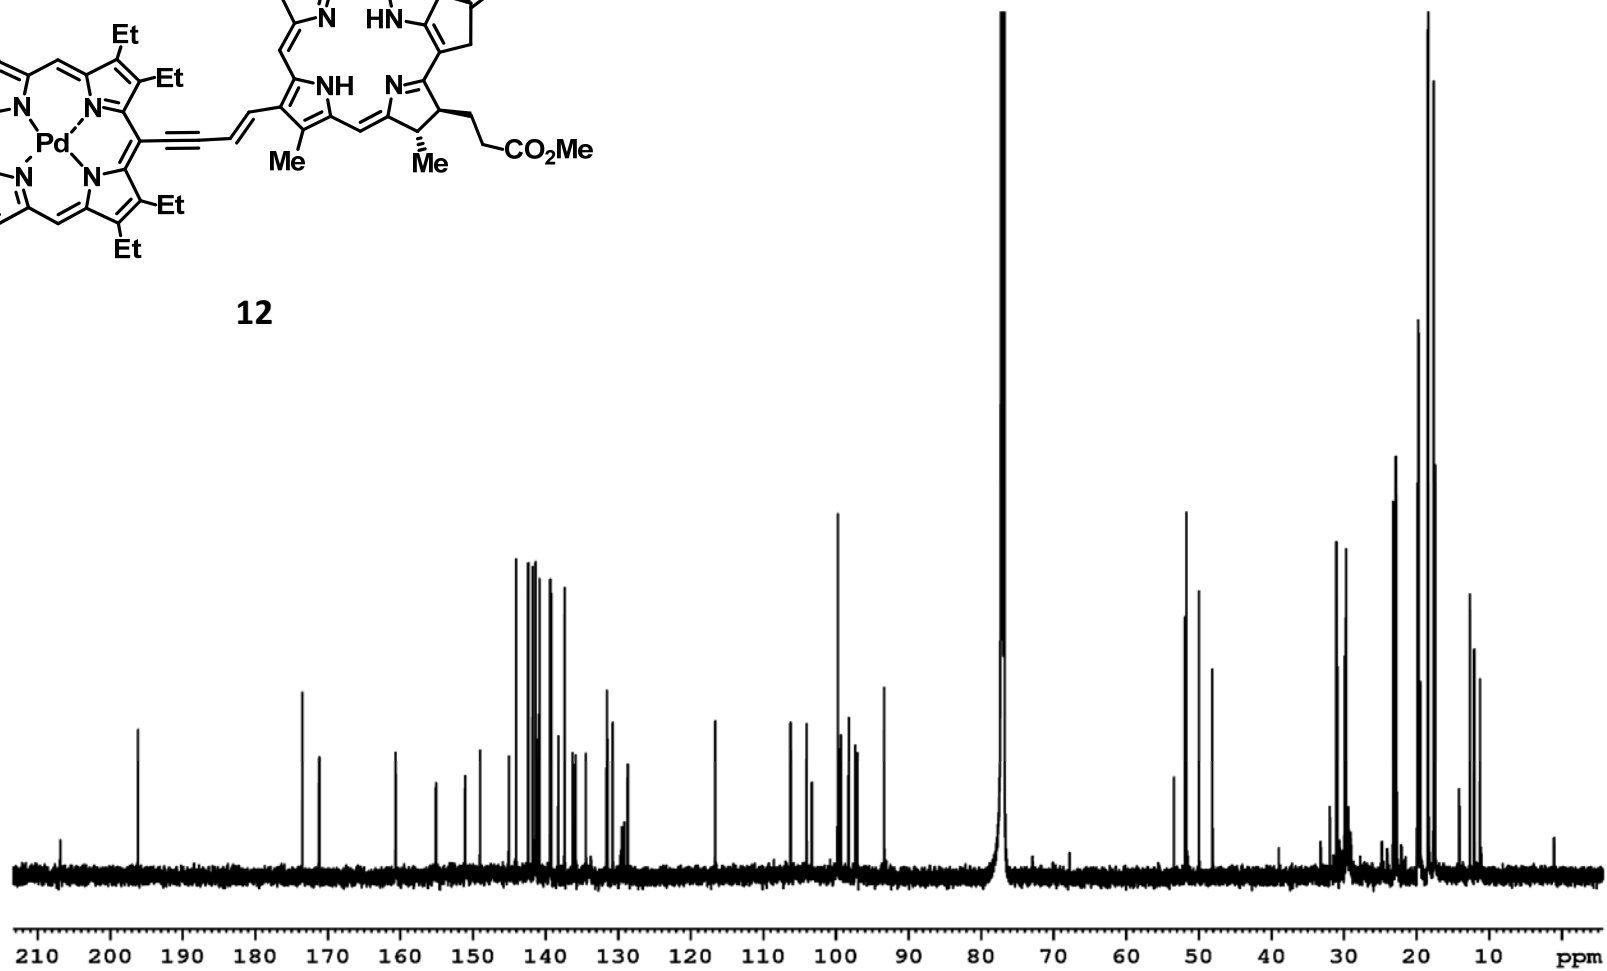

Figure S7. <sup>13</sup>C NMR spectrum of the dyad 12.



## Mass spectra

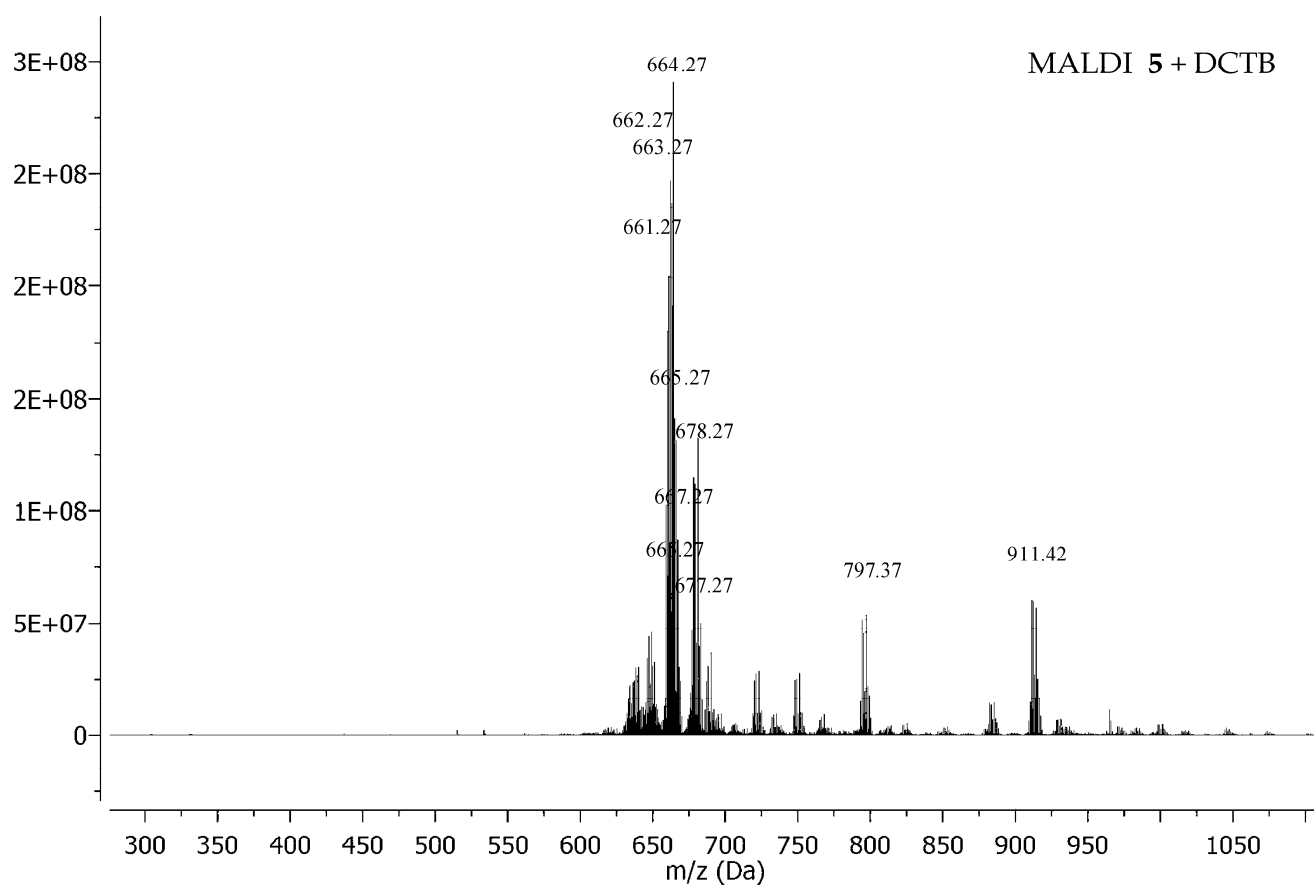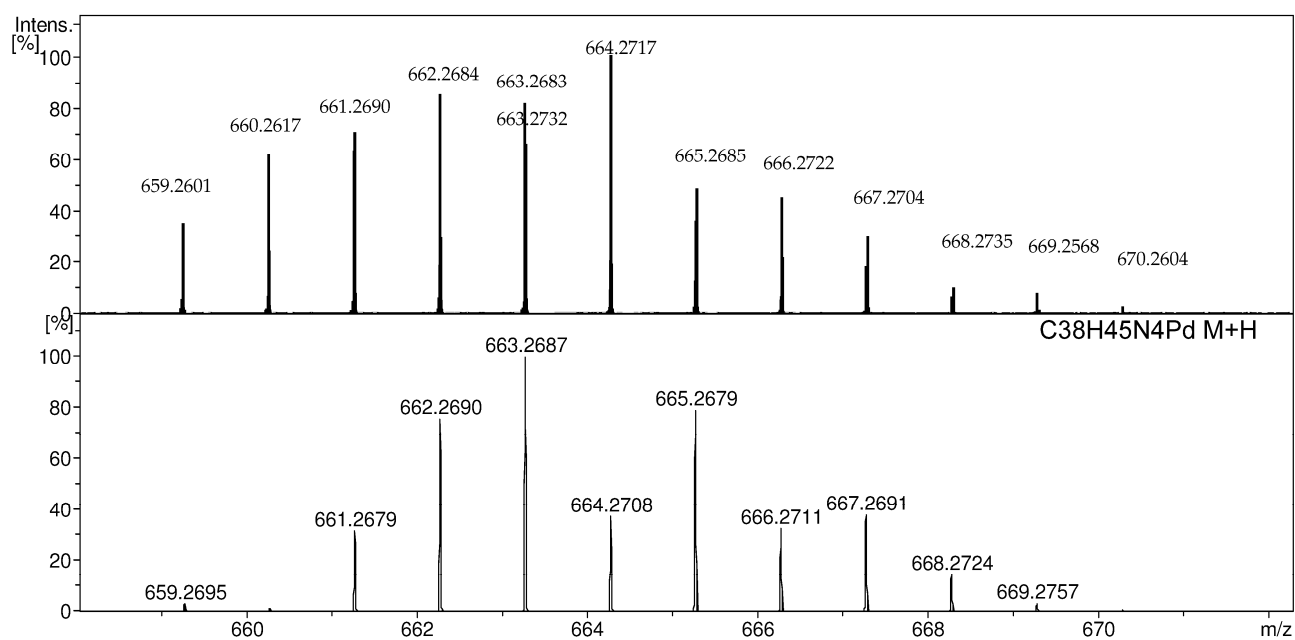

**Figure S8.** MALDI mass spectrum of **5** with expanded molecular ion area and simulated mass spectrum of the protonated molecule.

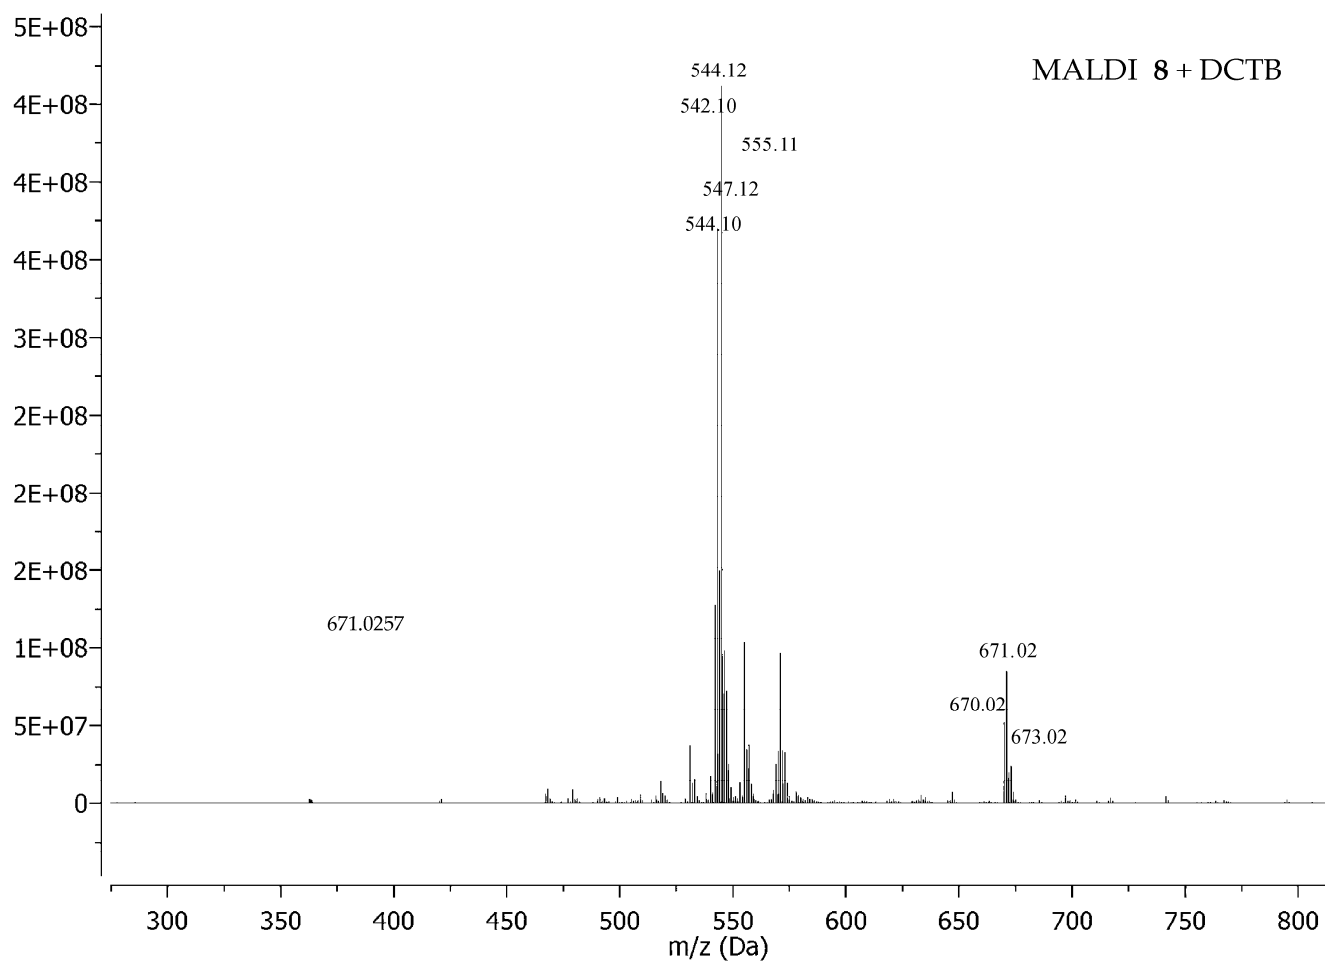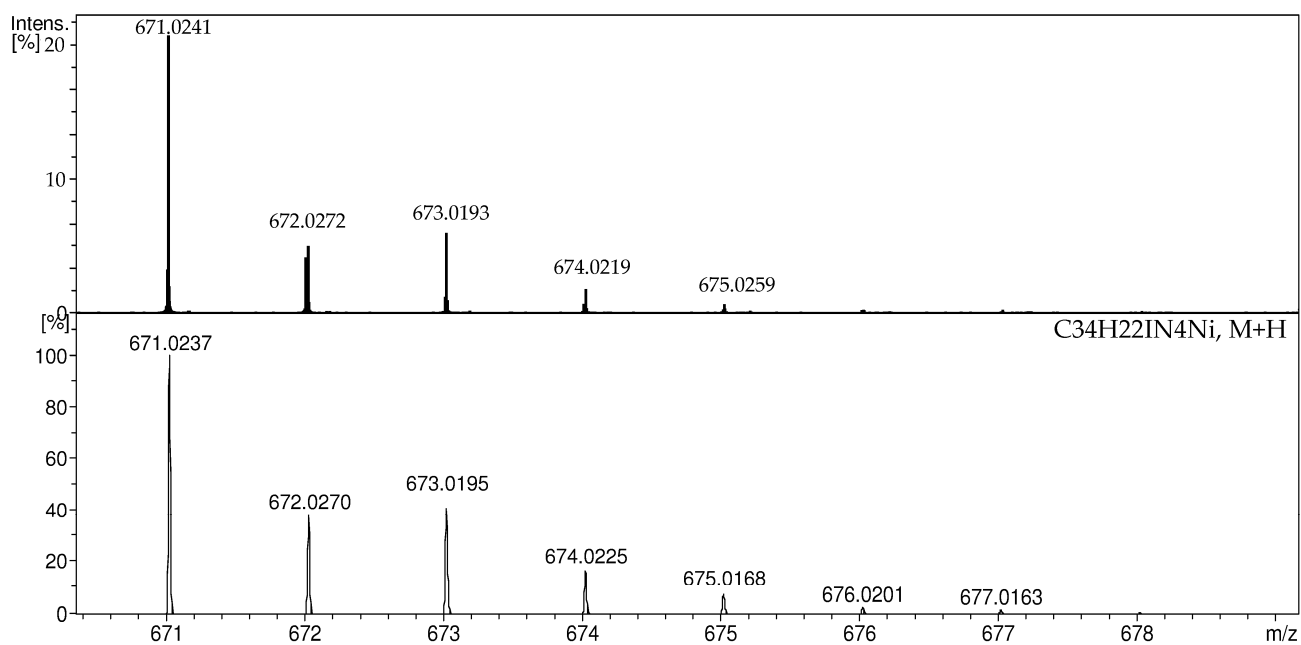

**Figure S9.** MALDI mass spectrum of **8** with expanded molecular ion area and simulated mass spectrum of the protonated molecule.

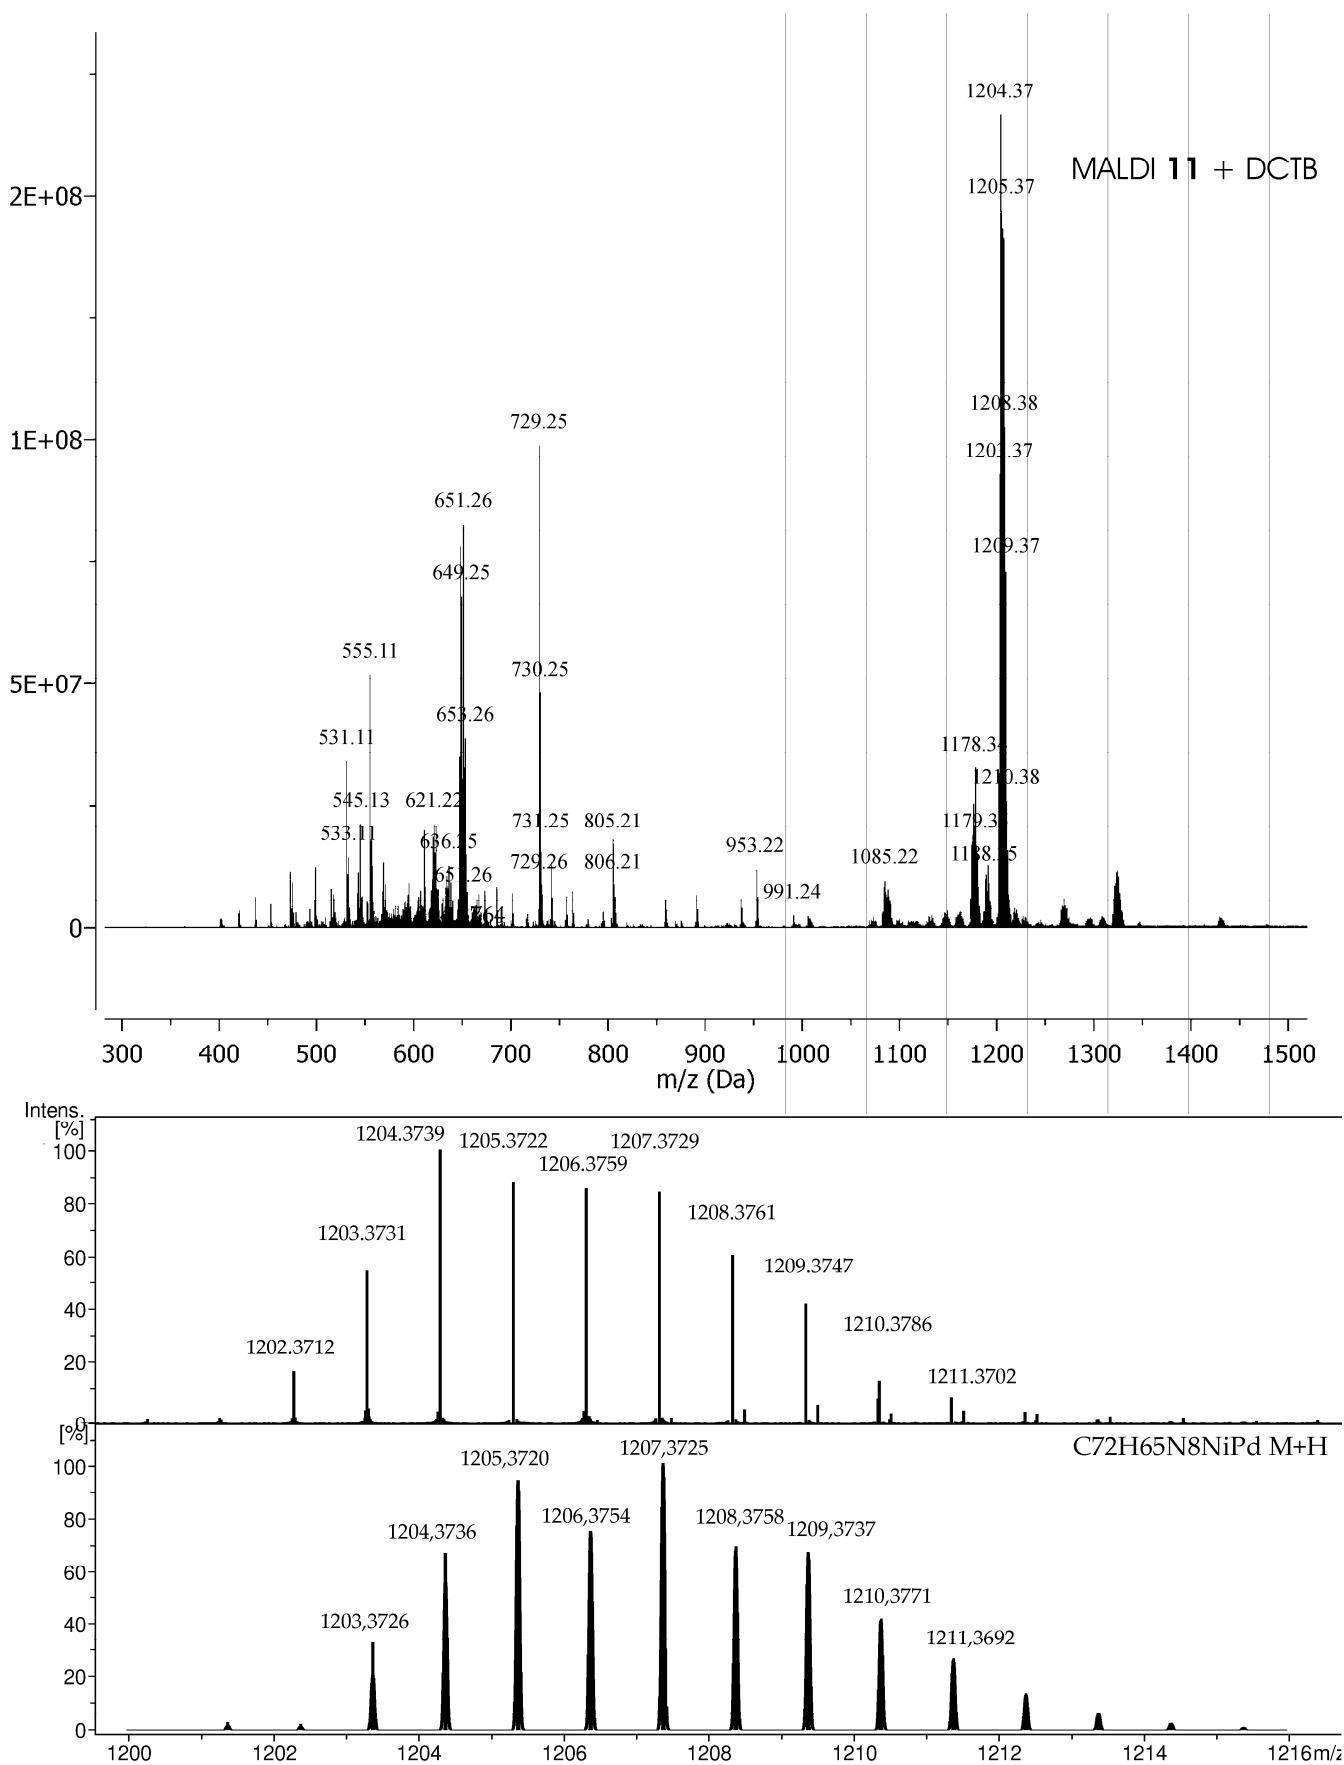

**Figure S10.** MALDI mass spectrum of **11** with expanded molecular ion area and simulated mass spectrum of the protonated molecule.

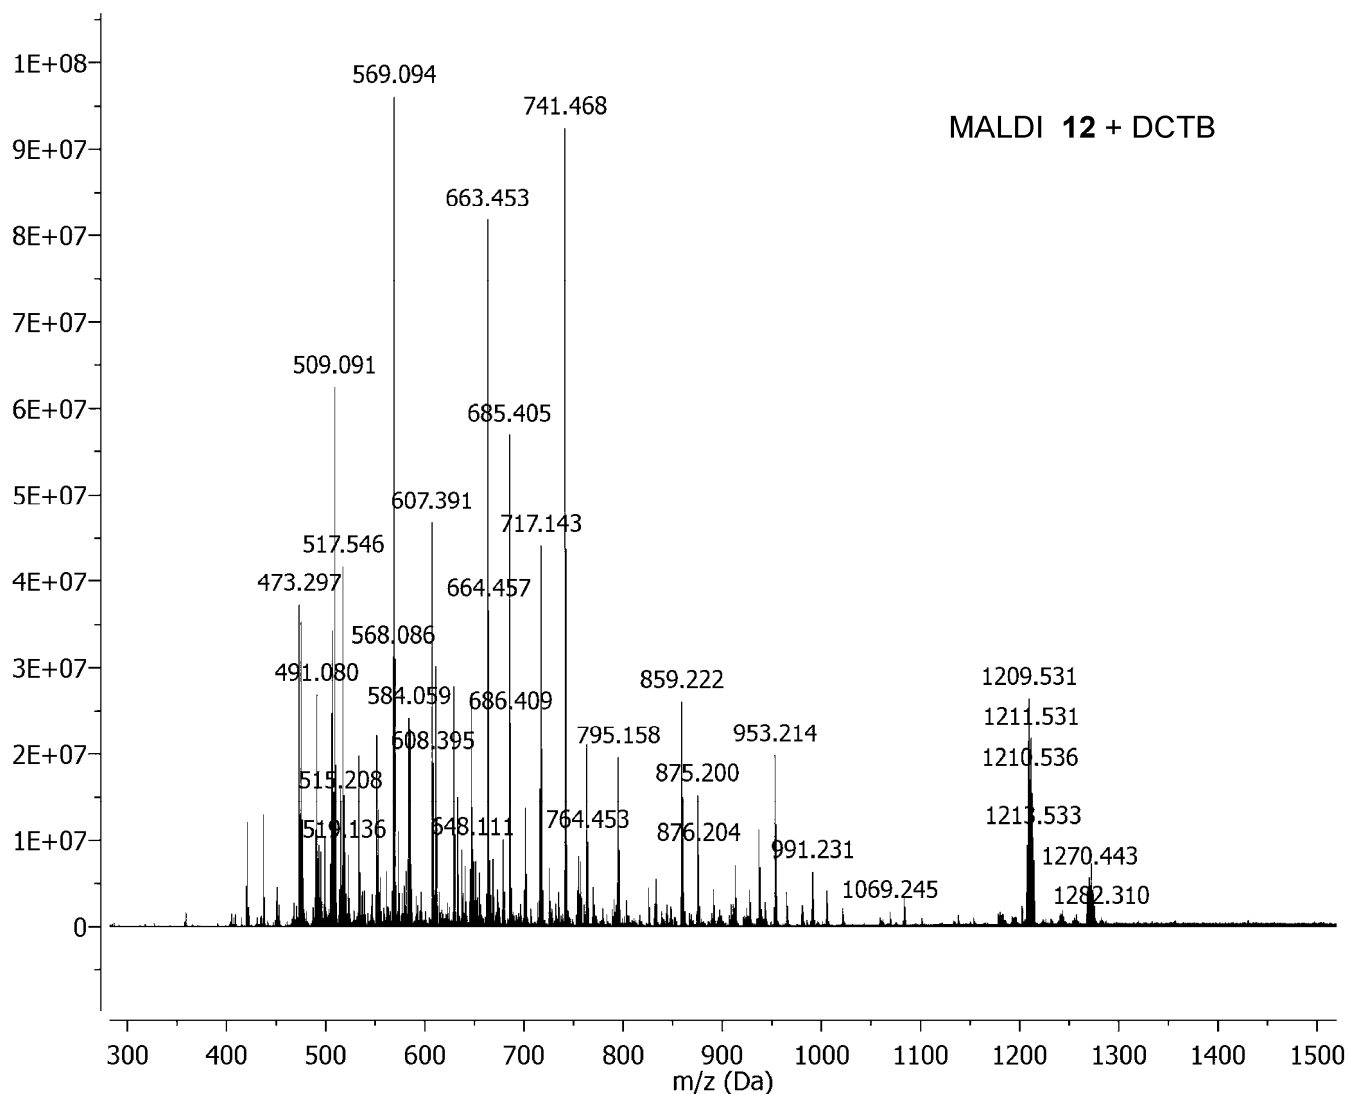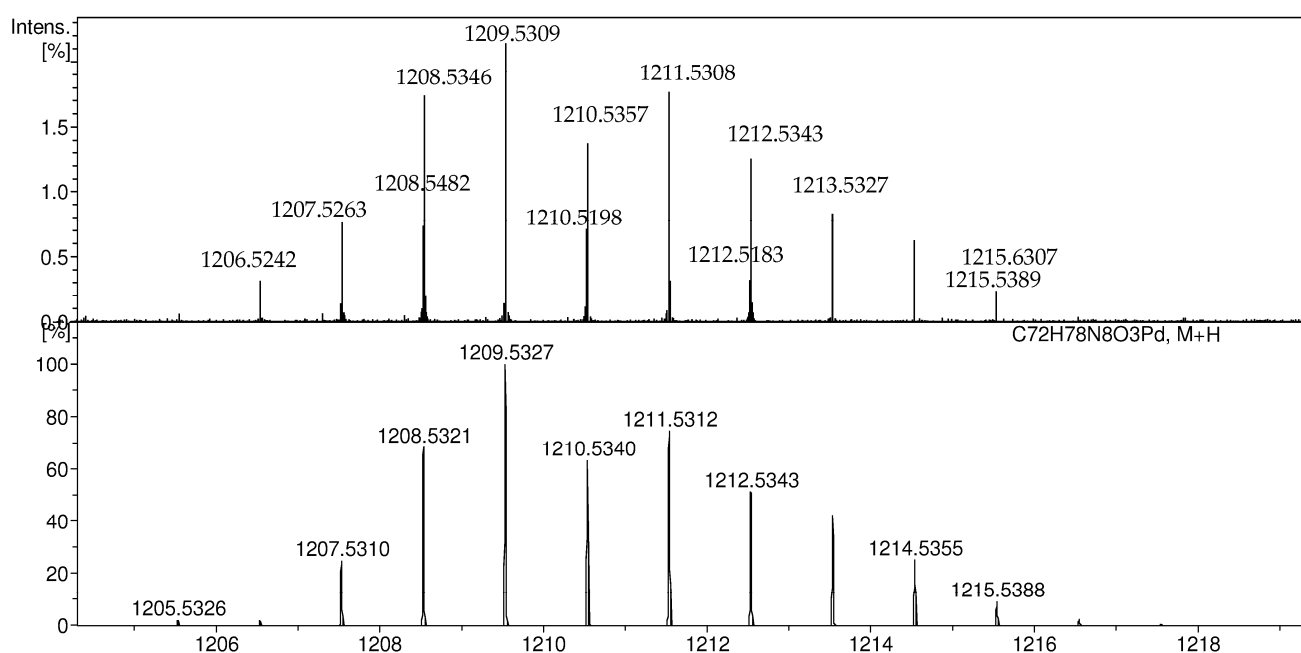

**Figure S11.** MALDI mass spectrum of **12** with expanded molecular ion area and simulated mass spectrum of the protonated molecule.

## Photophysical data

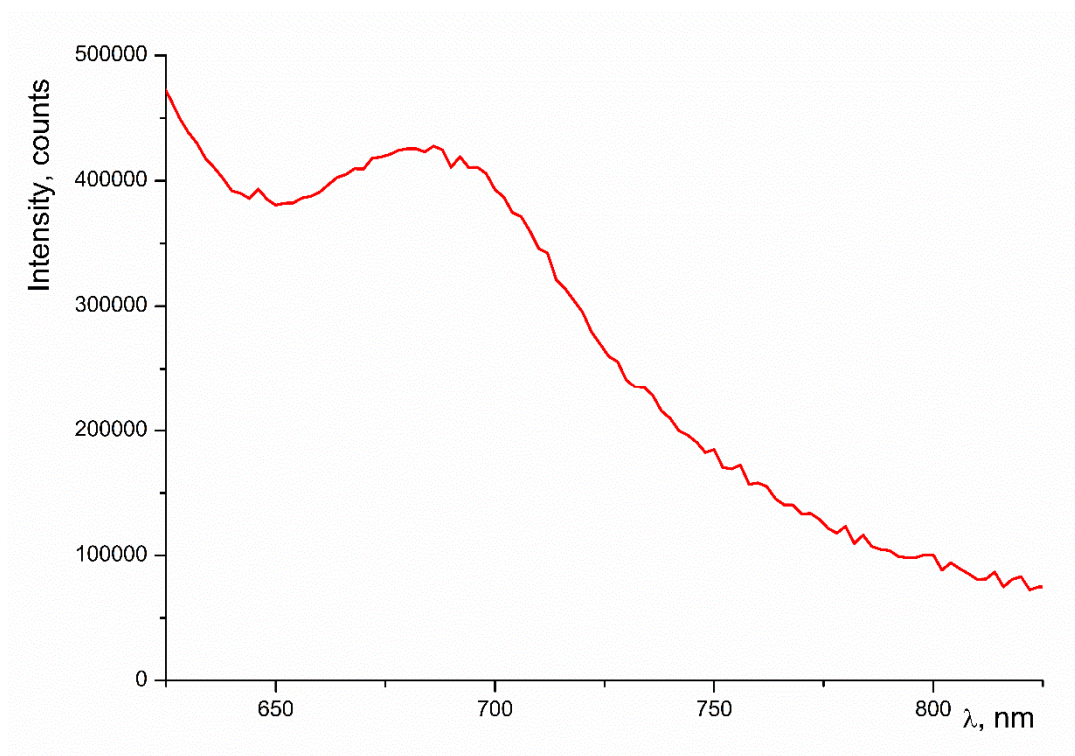

**Figure S12.** Steady state room temperature (298 K) luminescence spectrum of the dyad **11**, excitation at 506 nm.

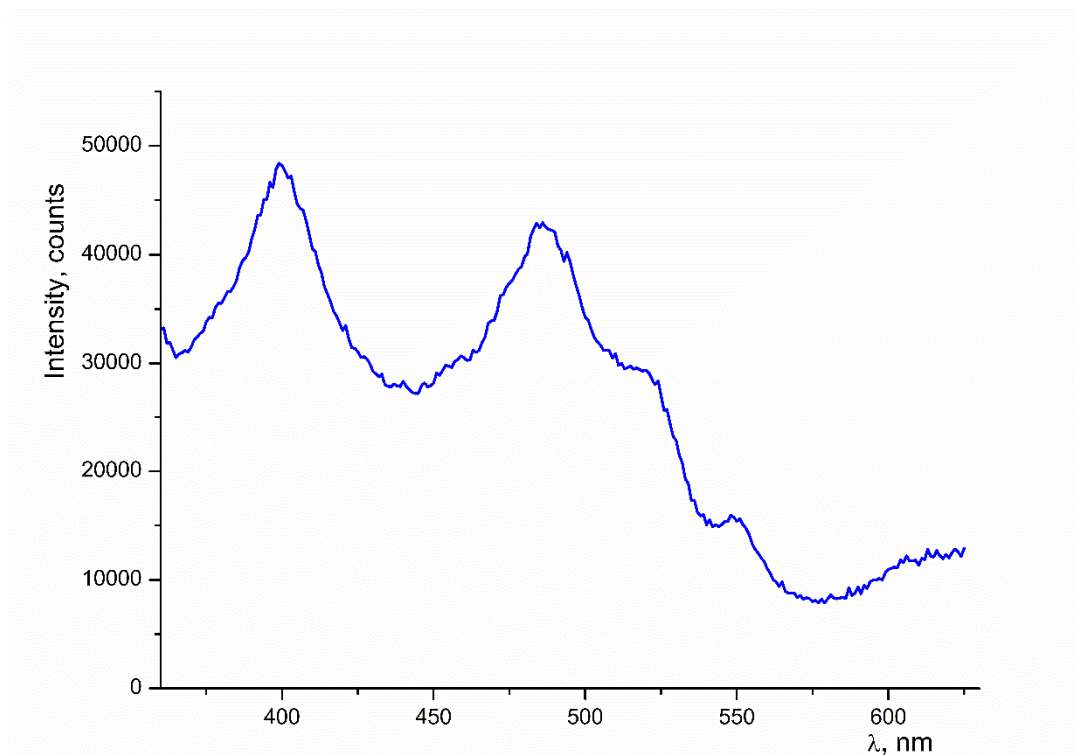

**Figure S13.** Room temperature (298 K) luminescence excitation spectrum of the dyad **11** at 670 nm emission.

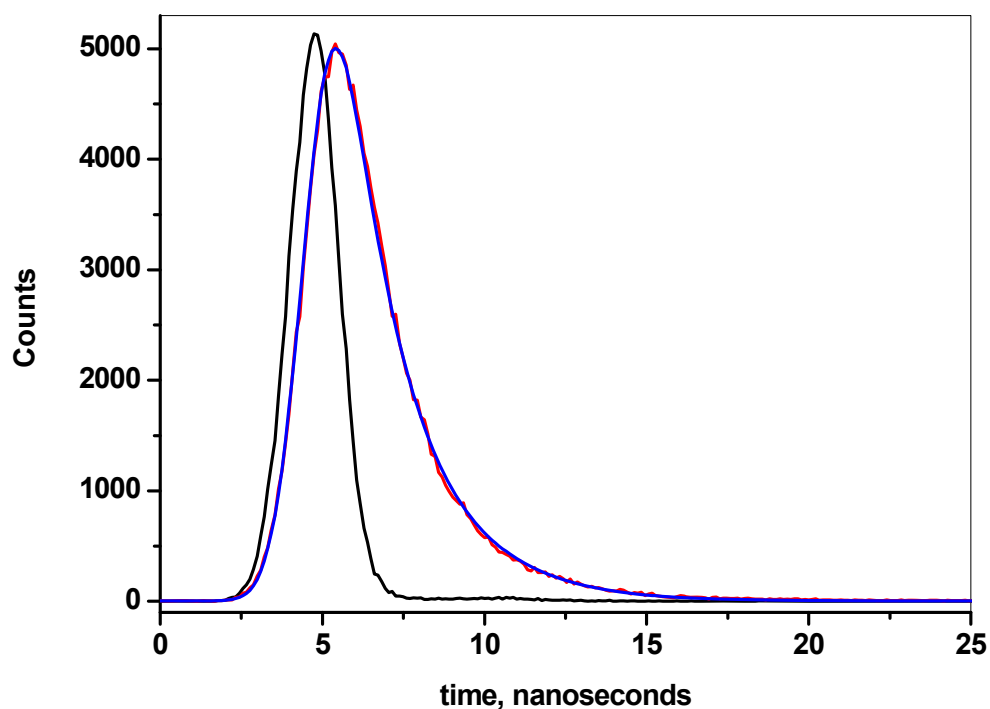

**Figure S14.** Fluorescence decay curve of compound **12** in air saturated  $\text{CH}_2\text{Cl}_2$  solution (red line), prompt (black line), modelling of experimental data by DAS 6 software of Horiba (blue line). Defined life time is 1.89 nanosecond.

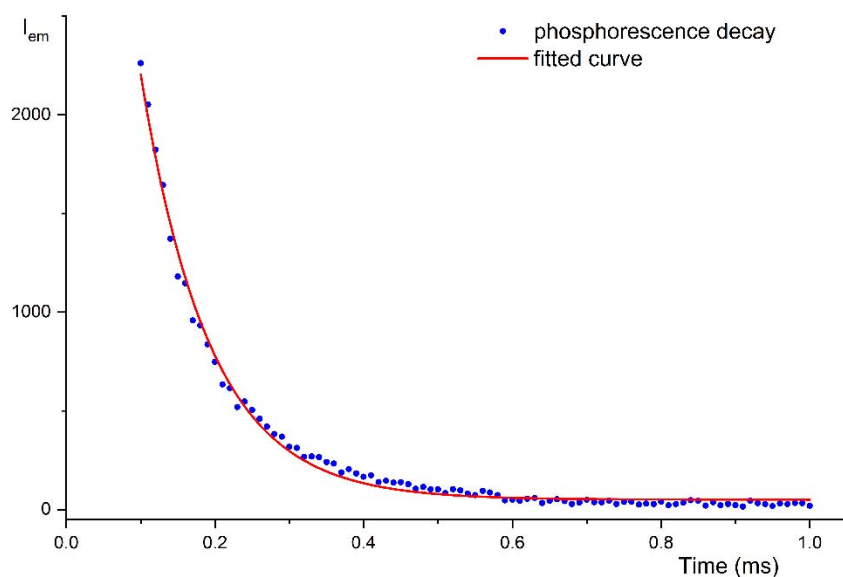

**Figure S15.** Phosphorescence decay (blue line) at 298K recorded at 722 nm, excitation at 410 nm and fitted exponential curve (red line),  $t = 92$  mks. Compound **12** at concentration  $10^{-6}$  M in  $\text{CH}_2\text{Cl}_2$ .

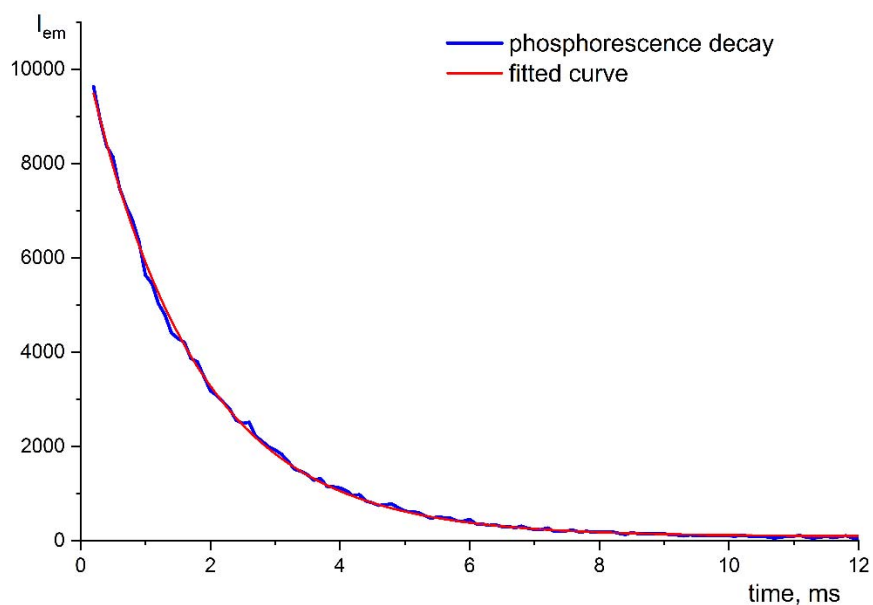

**Figure S16.** Phosphorescence decay (blue line) at 77K recorded at 662 nm, excitation at 397 nm and fitted exponential curve (red line),  $t=1.67$  ms. Compound **12** at concentration  $10^{-6}$  M in  $\text{CH}_2\text{Cl}_2$ .

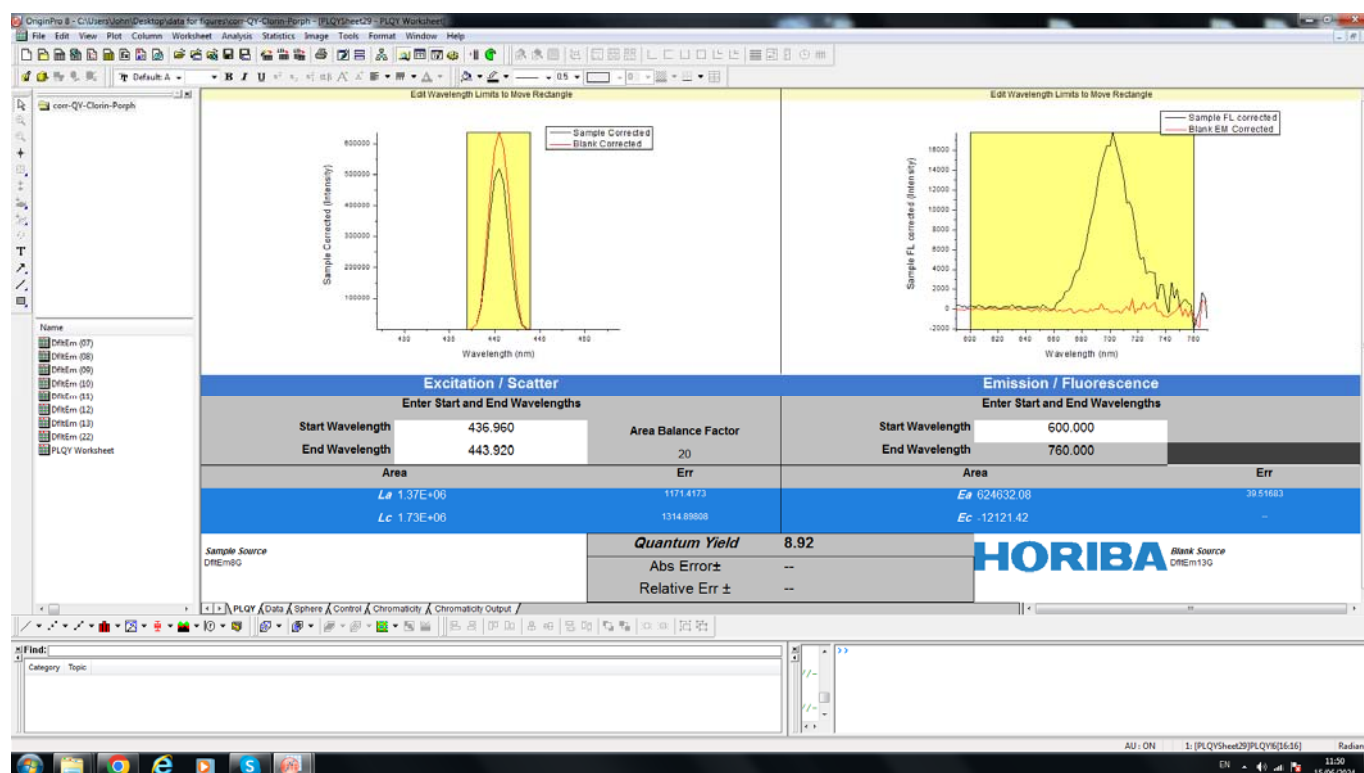

**Figure S17.** Quantum yield measurement. Compound **12** at concentration  $10^{-6}$  M in  $\text{CH}_2\text{Cl}_2$ .

## Results of DFT calculations

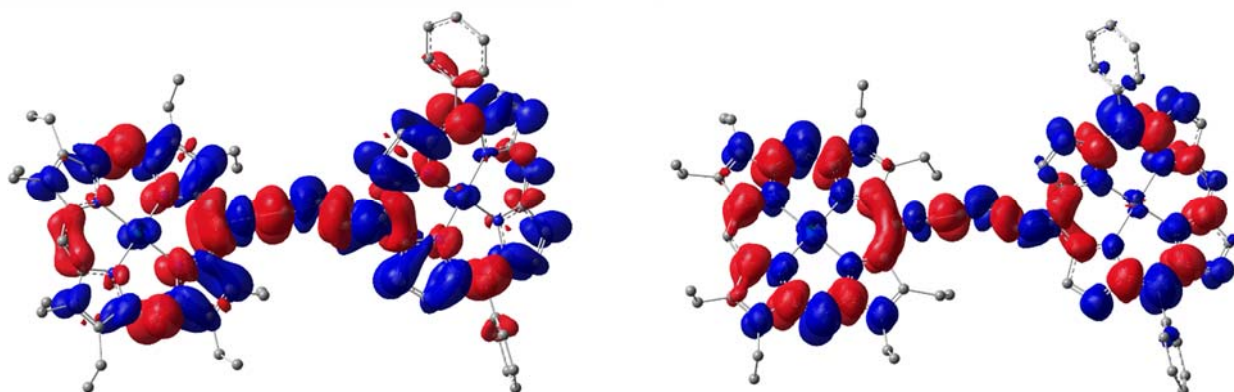

**Figure S18.** Electron density difference maps for the lowest wavelength (Q-band) (left) and most intense (B-band) (right) transitions of **11**. Increased and decreased densities are marked red and blue, respectively.

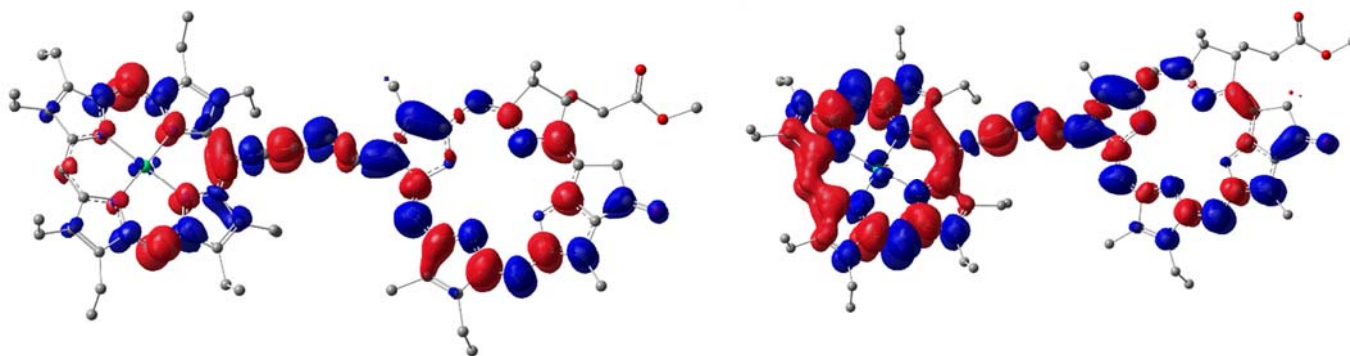

**Figure S19.** Electron density difference maps for the lowest wavelength (Q-band) (left) and most intense (B-band) (right) transitions of **12**. Increased and decreased densities are marked red and blue, respectively.



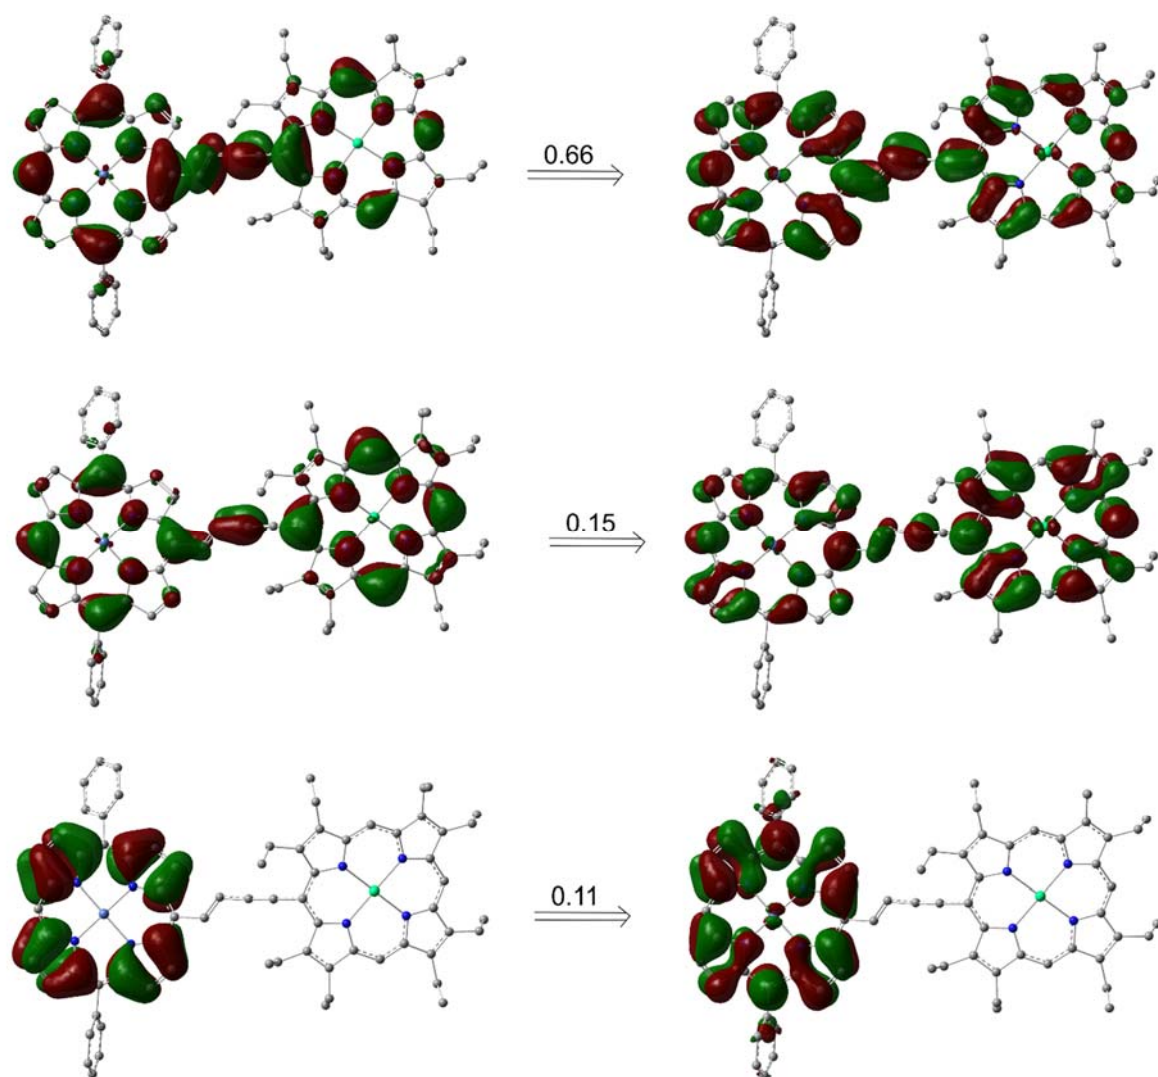

**Figure S20.** Natural transition orbitals of **11** composing the excited state 1 (615 nm band), calculated with wB97XD/DGDZVP. The coefficients of the transition components are above the arrows.

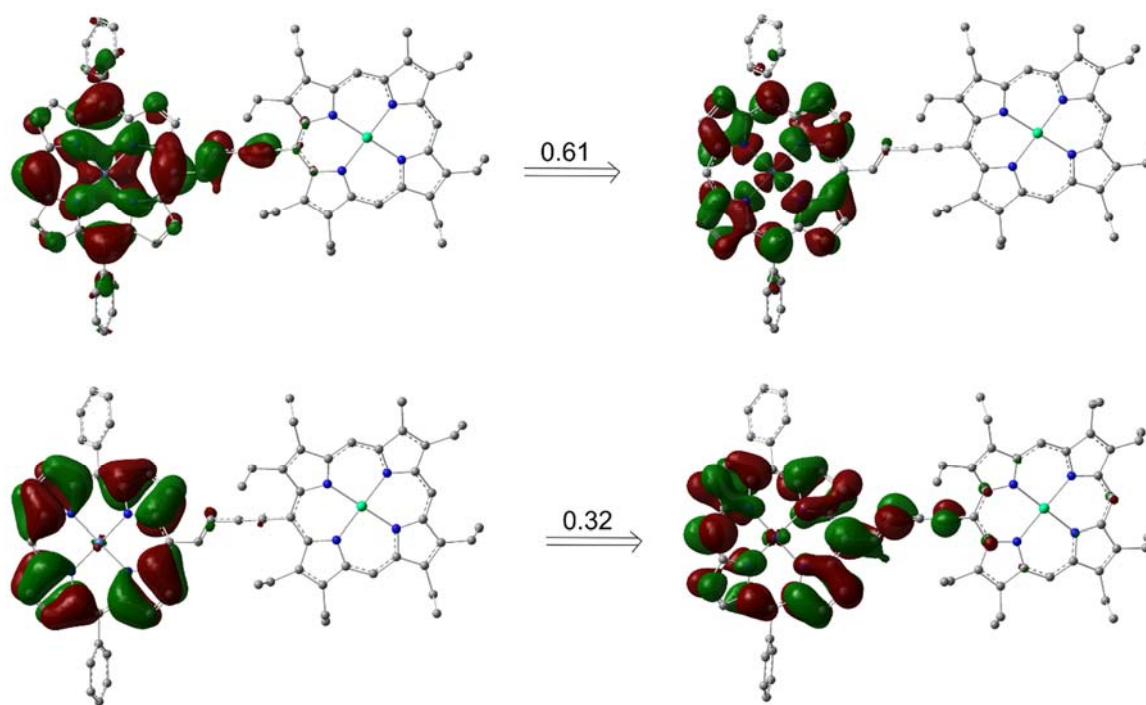

**Figure S21.** Natural transition orbitals of **11** composing the excited state 4 (615 nm band), calculated with wB97XD/DGDZVP. The coefficients of the transition components are above the arrows.

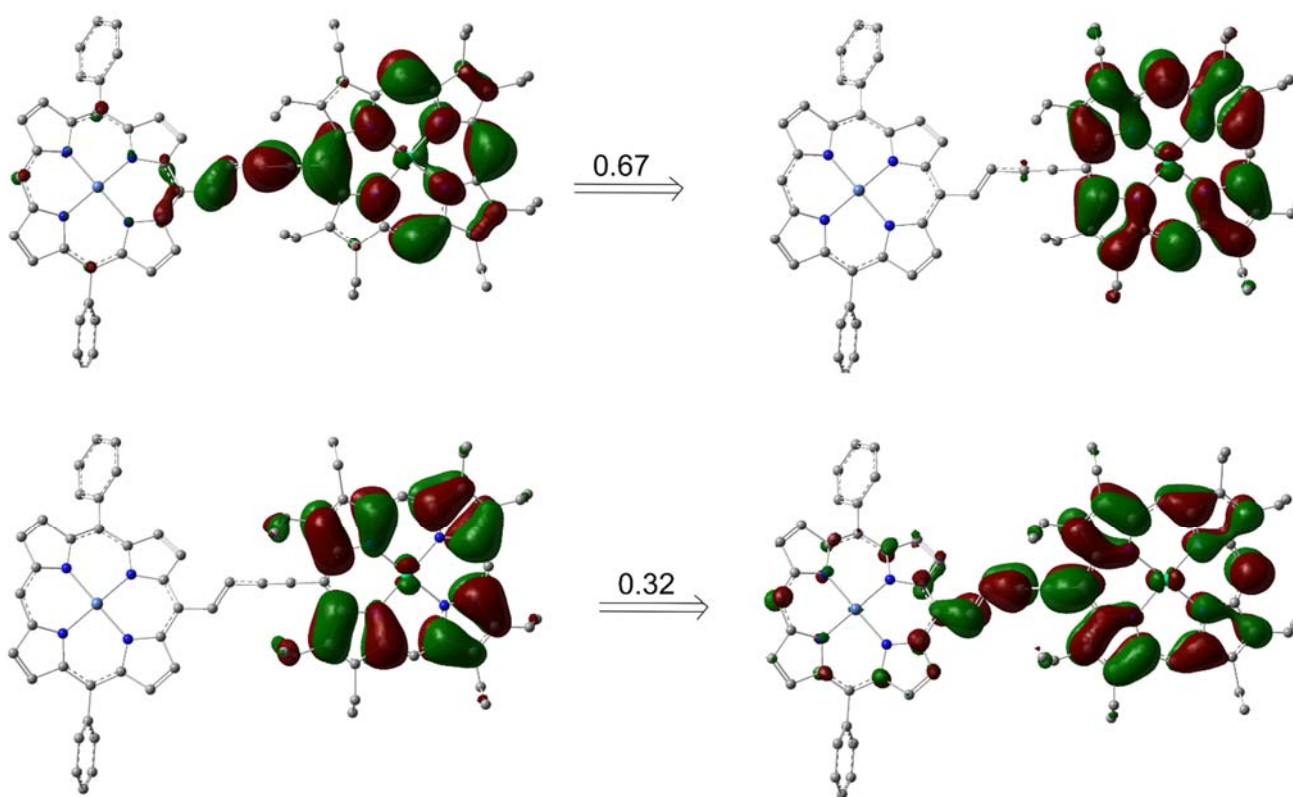

**Figure S22.** Natural transition orbitals of **11** composing the excited state 6 (615 nm band), calculated with wB97XD/DGDZVP. The coefficients of the transition components are above the arrows.

**Table S1.** Cartesian coordinates and energy of the dyad **11** in chloroform. RB3LYP/(6-31G(d,p) for C,H,N; LanL2DZ for P,Ni) E= -3516.495153 a.u.

| Atom | x        | y        | z        |
|------|----------|----------|----------|
| N    | 4.558866 | 1.263197 | 0.913058 |
| N    | 7.409064 | 1.25251  | 0.192245 |
| N    | 7.222101 | -1.52801 | -0.49468 |
| N    | 4.374061 | -1.51315 | 0.230217 |
| C    | 3.204679 | 1.135483 | 1.093614 |
| C    | 4.908598 | 2.537697 | 1.290238 |
| C    | 7.320193 | 2.537456 | 0.654534 |
| C    | 8.694799 | 1.074069 | -0.25011 |
| C    | 8.532786 | -1.32841 | -0.84499 |
| C    | 6.958383 | -2.85871 | -0.67563 |
| C    | 4.551334 | -2.8523  | -0.02374 |
| C    | 3.043878 | -1.31639 | 0.501743 |
| C    | 2.674229 | 2.384456 | 1.650025 |
| C    | 2.466897 | -0.04442 | 0.785317 |
| C    | 3.743527 | 3.236692 | 1.781032 |
| C    | 6.168745 | 3.113857 | 1.177955 |
| C    | 8.59723  | 3.212752 | 0.495743 |
| C    | 9.45182  | 2.302943 | -0.074   |
| C    | 9.210209 | -0.11782 | -0.74757 |
| C    | 9.122945 | -2.58322 | -1.28235 |
| C    | 8.143812 | -3.53798 | -1.17075 |
| C    | 5.730459 | -3.46356 | -0.43435 |
| C    | 3.297753 | -3.5496  | 0.145827 |
| C    | 2.349227 | -2.60677 | 0.459513 |
| C    | 1.281473 | 2.715322 | 2.124586 |
| C    | 3.744847 | 4.650044 | 2.299334 |
| C    | 8.893043 | 4.62452  | 0.92189  |
| C    | 10.88526 | 2.505408 | -0.48185 |
| H    | 10.2501  | -0.11255 | -1.05256 |
| C    | 10.53089 | -2.75224 | -1.7835  |

|   |          |          |          |
|---|----------|----------|----------|
| C | 8.246791 | -5.01152 | -1.45431 |
| H | 5.677173 | -4.53046 | -0.61532 |
| C | 3.109625 | -5.03292 | -0.02812 |
| C | 0.919731 | -2.9412  | 0.801987 |
| H | 0.543317 | 2.48199  | 1.356546 |
| H | 1.22738  | 3.797976 | 2.275935 |
| C | 0.895447 | 2.018221 | 3.442888 |
| H | 4.685987 | 4.850488 | 2.823776 |
| H | 2.959648 | 4.76431  | 3.053582 |
| C | 3.542441 | 5.706582 | 1.195482 |
| H | 8.044693 | 5.273338 | 0.672501 |
| H | 9.739829 | 5.006252 | 0.341701 |
| C | 9.20987  | 4.75738  | 2.424532 |
| H | 11.47415 | 1.61657  | -0.22479 |
| H | 11.31411 | 3.325678 | 0.103439 |
| C | 11.05742 | 2.812325 | -1.98255 |
| H | 10.83528 | -3.79671 | -1.65782 |
| H | 11.2193  | -2.16476 | -1.16388 |
| C | 10.70737 | -2.34913 | -3.26072 |
| H | 9.052958 | -5.18457 | -2.17512 |
| H | 7.329662 | -5.36083 | -1.94394 |
| C | 8.5056   | -5.86081 | -0.19426 |
| H | 2.302287 | -5.379   | 0.62532  |
| H | 4.007725 | -5.56139 | 0.311022 |
| C | 2.795317 | -5.44352 | -1.48014 |
| H | 0.722106 | -3.96222 | 0.46061  |
| H | 0.230918 | -2.29904 | 0.252528 |
| C | 0.60959  | -2.85932 | 2.308602 |
| H | -0.11068 | 2.316782 | 3.756105 |
| H | 0.905425 | 0.930249 | 3.337248 |
| H | 1.59386  | 2.286084 | 4.242499 |
| H | 3.560752 | 6.717139 | 1.616766 |
| H | 4.328107 | 5.639732 | 0.436223 |

|   |          |          |          |
|---|----------|----------|----------|
| H | 2.581642 | 5.565133 | 0.690589 |
| H | 9.411751 | 5.800783 | 2.688131 |
| H | 8.373891 | 4.407254 | 3.038192 |
| H | 10.08869 | 4.16205  | 2.691705 |
| H | 12.11499 | 2.945815 | -2.23285 |
| H | 10.66144 | 2.00068  | -2.60098 |
| H | 10.52392 | 3.727894 | -2.25687 |
| H | 11.74639 | -2.48426 | -3.57872 |
| H | 10.07017 | -2.95804 | -3.90983 |
| H | 10.43657 | -1.3007  | -3.42032 |
| H | 8.567437 | -6.92408 | -0.44835 |
| H | 9.445319 | -5.56966 | 0.285642 |
| H | 7.705054 | -5.73292 | 0.541143 |
| H | 2.678666 | -6.52933 | -1.5604  |
| H | 1.869219 | -4.97455 | -1.82723 |
| H | 3.596506 | -5.13577 | -2.15952 |
| H | -0.43161 | -3.13773 | 2.503364 |
| H | 1.255005 | -3.53819 | 2.875521 |
| H | 0.764099 | -1.84786 | 2.693451 |
| H | 6.254059 | 4.142368 | 1.507635 |
| C | 1.058335 | 0.080647 | 0.671396 |
| C | -0.14235 | 0.212226 | 0.483581 |
| C | -8.43158 | -5.33427 | 1.225789 |
| C | -8.10163 | -4.57959 | 0.088116 |
| C | -8.03269 | -5.23085 | -1.15426 |
| C | -8.29688 | -6.5975  | -1.25823 |
| C | -8.62936 | -7.33655 | -0.12076 |
| C | -8.69394 | -6.70129 | 1.121525 |
| H | -8.47052 | -4.84728 | 2.195571 |
| H | -7.7772  | -4.65795 | -2.04088 |
| H | -8.94275 | -7.27036 | 2.012669 |
| C | -3.60587 | 1.932902 | -1.39318 |
| C | -4.47443 | 2.928223 | -1.72189 |

|   |          |          |          |
|---|----------|----------|----------|
| C | -5.7509  | 2.571949 | -1.16386 |
| N | -5.67536 | 1.317239 | -0.58095 |
| C | -4.3605  | 0.933484 | -0.68169 |
| C | -5.36675 | -3.57174 | -0.08012 |
| C | -4.24962 | -2.7961  | -0.0856  |
| C | -4.69045 | -1.42497 | -0.12119 |
| N | -6.06571 | -1.37014 | -0.07758 |
| C | -6.49694 | -2.68196 | -0.03664 |
| C | -3.83727 | -0.31624 | -0.28762 |
| C | -10.74   | -1.49221 | 1.483188 |
| C | -10.1239 | -2.62168 | 1.040244 |
| C | -8.81612 | -2.22869 | 0.570546 |
| N | -8.66953 | -0.86038 | 0.666243 |
| C | -9.8431  | -0.39963 | 1.218134 |
| C | -7.80945 | -3.11596 | 0.179728 |
| C | -9.04694 | 4.014868 | -0.02211 |
| C | -9.92954 | 3.335739 | 0.759959 |
| C | -9.45628 | 1.979516 | 0.835599 |
| N | -8.26683 | 1.844355 | 0.155208 |
| C | -8.00548 | 3.083386 | -0.38621 |
| C | -6.85651 | 3.426016 | -1.10707 |
| C | -10.1814 | 0.934092 | 1.383505 |
| H | -2.5648  | 1.849075 | -1.66346 |
| H | -4.27073 | 3.8268   | -2.28403 |
| H | -5.42709 | -4.64949 | -0.06589 |
| H | -3.22565 | -3.13712 | -0.09499 |
| H | -11.7266 | -1.38749 | 1.914642 |
| H | -10.5011 | -3.633   | 1.046532 |
| H | -9.07332 | 5.054177 | -0.31355 |
| H | -10.8366 | 3.697825 | 1.225522 |
| C | -5.87882 | 5.750345 | -1.30421 |
| C | -6.78868 | 4.775419 | -1.74572 |
| C | -7.65918 | 5.097223 | -2.80023 |

|    |          |          |          |
|----|----------|----------|----------|
| C  | -7.61411 | 6.35504  | -3.40342 |
| C  | -6.70204 | 7.31457  | -2.95842 |
| C  | -5.83626 | 7.009025 | -1.90577 |
| H  | -5.21182 | 5.521424 | -0.4786  |
| H  | -8.36697 | 4.351884 | -3.15092 |
| H  | -5.12987 | 7.752372 | -1.54755 |
| H  | -8.24464 | -7.08319 | -2.22839 |
| H  | -8.83403 | -8.40015 | -0.20113 |
| H  | -11.1274 | 1.165026 | 1.861215 |
| H  | -8.29018 | 6.583354 | -4.22234 |
| H  | -6.66755 | 8.293864 | -3.42681 |
| C  | -2.40273 | -0.50859 | -0.12651 |
| H  | -2.0116  | -1.50342 | -0.30957 |
| C  | -1.52241 | 0.433146 | 0.31316  |
| H  | -1.88639 | 1.424478 | 0.577755 |
| Pd | 5.88622  | -0.12773 | 0.197055 |
| Ni | -7.16915 | 0.233535 | 0.049161 |

**Table S2.** Cartesian coordinates and energy of the dyad **12** in chloroform. RB3LYP/(6-31G(d,p) for C,H,N,O; LanL2DZ for P,Ni) E= -3581.257522 a.u.

| Atom | x        | y        | z        |
|------|----------|----------|----------|
| N    | 5.623729 | -1.74748 | -0.5925  |
| N    | 8.418073 | -1.30638 | 0.205994 |
| N    | 7.920694 | 1.515236 | 0.378313 |
| N    | 5.129112 | 1.069591 | -0.42382 |
| C    | 4.274317 | -1.79889 | -0.8357  |
| C    | 6.117542 | -3.02305 | -0.7256  |
| C    | 8.482149 | -2.65385 | -0.02444 |
| C    | 9.655853 | -0.91674 | 0.649385 |
| C    | 9.224505 | 1.520936 | 0.80309  |
| C    | 7.516383 | 2.820987 | 0.312155 |
| C    | 5.15856  | 2.443612 | -0.40686 |
| C    | 3.840656 | 0.687037 | -0.69858 |
| C    | 3.899767 | -3.1753  | -1.17621 |

|   |          |          |          |
|---|----------|----------|----------|
| C | 3.408427 | -0.66904 | -0.76785 |
| C | 5.054131 | -3.91764 | -1.12013 |
| C | 7.421905 | -3.43245 | -0.47342 |
| C | 9.811397 | -3.14985 | 0.290507 |
| C | 10.54065 | -2.06862 | 0.716925 |
| C | 10.02363 | 0.391598 | 0.943921 |
| C | 9.662604 | 2.888368 | 1.032297 |
| C | 8.600489 | 3.698889 | 0.719826 |
| C | 6.248334 | 3.23971  | -0.07327 |
| C | 3.851851 | 2.962326 | -0.73882 |
| C | 3.019451 | 1.883071 | -0.91014 |
| C | 2.571988 | -3.73147 | -1.62565 |
| C | 5.223104 | -5.3909  | -1.37909 |
| C | 10.26904 | -4.57339 | 0.128142 |
| C | 11.96538 | -2.04131 | 1.198019 |
| H | 11.04208 | 0.550615 | 1.278449 |
| C | 11.0181  | 3.290154 | 1.545291 |
| C | 8.540036 | 5.201625 | 0.742868 |
| H | 6.079714 | 4.309807 | -0.08644 |
| C | 3.508119 | 4.424469 | -0.83872 |
| C | 1.583537 | 1.996784 | -1.35495 |
| H | 1.777507 | -3.44466 | -0.93584 |
| H | 2.63289  | -4.82334 | -1.57914 |
| C | 2.184875 | -3.32456 | -3.06006 |
| H | 6.203458 | -5.57599 | -1.83254 |
| H | 4.490034 | -5.71828 | -2.12333 |
| C | 5.077317 | -6.25602 | -0.1118  |
| H | 9.47883  | -5.25793 | 0.459536 |
| H | 11.11951 | -4.75695 | 0.793252 |
| C | 10.67334 | -4.92557 | -1.31701 |
| H | 12.47265 | -1.15087 | 0.807244 |
| H | 12.50385 | -2.89812 | 0.779383 |
| C | 12.09361 | -2.06587 | 2.733882 |



|   |          |          |          |
|---|----------|----------|----------|
| H | 11.22065 | 4.32673  | 1.255829 |
| H | 11.7938  | 2.687568 | 1.057239 |
| C | 11.15804 | 3.156317 | 3.074469 |
| H | 9.284611 | 5.58168  | 1.450365 |
| H | 7.567395 | 5.528552 | 1.130134 |
| C | 8.780042 | 5.845663 | -0.63688 |
| H | 2.704536 | 4.56278  | -1.56927 |
| H | 4.365017 | 4.978936 | -1.2377  |
| C | 3.081032 | 5.046062 | 0.505531 |
| H | 1.267461 | 3.03464  | -1.20985 |
| H | 0.933906 | 1.390658 | -0.72303 |
| C | 1.362636 | 1.618881 | -2.8318  |
| H | 1.2299   | -3.77888 | -3.34525 |
| H | 2.08257  | -2.24025 | -3.15375 |
| H | 2.944946 | -3.65469 | -3.77572 |
| H | 5.216853 | -7.31631 | -0.34701 |
| H | 5.816311 | -5.97495 | 0.645202 |
| H | 4.084863 | -6.13325 | 0.333208 |
| H | 10.99293 | -5.97049 | -1.3872  |
| H | 9.838379 | -4.77812 | -2.00922 |
| H | 11.49977 | -4.29279 | -1.65572 |
| H | 13.14571 | -2.04042 | 3.036121 |
| H | 11.58872 | -1.20715 | 3.187457 |
| H | 11.64159 | -2.9725  | 3.14841  |
| H | 12.16044 | 3.452979 | 3.400176 |
| H | 10.43029 | 3.791301 | 3.589511 |
| H | 10.98611 | 2.125315 | 3.399315 |
| H | 8.72072  | 6.937057 | -0.57157 |
| H | 9.768884 | 5.580552 | -1.02419 |
| H | 8.037396 | 5.507837 | -1.36654 |
| H | 2.851361 | 6.110032 | 0.386149 |
| H | 2.19079  | 4.547364 | 0.901566 |
| H | 3.873847 | 4.950713 | 1.254187 |

|    |          |          |          |
|----|----------|----------|----------|
| H  | 0.310234 | 1.743837 | -3.10834 |
| H  | 1.964882 | 2.253774 | -3.48984 |
| H  | 1.638704 | 0.578499 | -3.02269 |
| H  | 7.625948 | -4.48735 | -0.61256 |
| C  | 2.014853 | -0.92169 | -0.67747 |
| C  | 0.826011 | -1.14485 | -0.50289 |
| C  | -1.5112  | -0.57366 | -0.0525  |
| H  | -1.21262 | 0.468636 | 0.022705 |
| C  | -0.53241 | -1.47792 | -0.33358 |
| H  | -0.78111 | -2.52853 | -0.46055 |
| Pd | 6.767847 | -0.11902 | -0.09457 |
| C  | -12.0839 | 1.170966 | 0.955443 |
| C  | -10.8537 | 1.908907 | 0.671326 |
| C  | -11.6848 | -0.33239 | 1.007894 |
| C  | -10.3484 | 3.194092 | 0.464118 |
| C  | -9.78796 | 0.977069 | 0.580027 |
| C  | -10.1775 | -0.36791 | 0.750555 |
| C  | -8.94201 | 3.019233 | 0.244671 |
| C  | -11.0987 | 4.489492 | 0.46981  |
| N  | -8.65562 | 1.658102 | 0.330499 |
| C  | -9.3138  | -1.45237 | 0.759433 |
| C  | -7.94149 | 3.959392 | -0.02385 |
| H  | -7.70358 | 1.322442 | 0.209334 |
| N  | -7.96119 | -1.27861 | 0.674793 |
| C  | -9.6811  | -2.92918 | 0.884338 |
| C  | -6.5859  | 3.665997 | -0.20531 |
| C  | -7.35661 | -2.44277 | 0.964174 |
| C  | -8.34858 | -3.5124  | 1.417892 |
| C  | -10.0172 | -3.58845 | -0.48046 |
| N  | -6.04913 | 2.404244 | -0.10173 |
| C  | -5.54968 | 4.654533 | -0.51133 |
| C  | -5.97796 | -2.67247 | 0.918896 |
| C  | -8.32445 | -3.68434 | 2.947341 |

|   |          |          |          |
|---|----------|----------|----------|
| C | -11.294  | -3.1248  | -1.18309 |
| C | -4.71993 | 2.554311 | -0.32011 |
| C | -4.37588 | 3.953813 | -0.59007 |
| C | -5.77948 | 6.124406 | -0.72782 |
| C | -4.96311 | -1.7681  | 0.58997  |
| C | -12.5603 | -3.52805 | -0.45284 |
| C | -3.76142 | 1.521026 | -0.26658 |
| C | -2.99753 | 4.466452 | -0.88287 |
| C | -6.25427 | 6.468631 | -2.15339 |
| N | -5.14271 | -0.43797 | 0.29954  |
| C | -3.55228 | -2.03786 | 0.501669 |
| O | -12.6431 | -4.40825 | 0.381589 |
| O | -13.615  | -2.79526 | -0.86505 |
| C | -3.94252 | 0.180048 | 0.035837 |
| H | -6.04305 | 0.022379 | 0.299116 |
| C | -2.91718 | -0.84825 | 0.146631 |
| C | -2.92389 | -3.36473 | 0.797357 |
| C | -14.8852 | -3.12833 | -0.26972 |
| H | -12.2853 | -0.87016 | 0.267273 |
| H | -11.9564 | -0.7433  | 1.988441 |
| H | -10.7211 | 5.168591 | 1.242811 |
| H | -12.1579 | 4.308633 | 0.661967 |
| H | -11.0079 | 5.010828 | -0.49009 |
| H | -8.25172 | 4.996465 | -0.09637 |
| H | -10.512  | -3.09389 | 1.577407 |
| H | -8.1234  | -4.47849 | 0.952511 |
| H | -10.0925 | -4.66753 | -0.31034 |
| H | -9.17214 | -3.43008 | -1.16021 |
| H | -5.65374 | -3.67998 | 1.155392 |
| H | -9.06302 | -4.42895 | 3.261326 |
| H | -8.55586 | -2.74    | 3.45134  |
| H | -7.33927 | -4.01596 | 3.289912 |
| H | -11.3493 | -3.58989 | -2.17644 |

|   |          |          |          |
|---|----------|----------|----------|
| H | -11.3013 | -2.04678 | -1.36373 |
| H | -4.85425 | 6.672603 | -0.51784 |
| H | -6.51623 | 6.495273 | -0.00437 |
| H | -2.73946 | 1.819305 | -0.47082 |
| H | -2.99007 | 5.554895 | -0.98192 |
| H | -2.60018 | 4.050423 | -1.81702 |
| H | -2.28921 | 4.202998 | -0.08824 |
| H | -7.19359 | 5.959344 | -2.39106 |
| H | -5.51248 | 6.159254 | -2.89647 |
| H | -6.4153  | 7.546516 | -2.26048 |
| H | -2.73123 | -3.94304 | -0.11536 |
| H | -3.56174 | -3.97635 | 1.439949 |
| H | -1.96522 | -3.23565 | 1.309147 |
| H | -14.8452 | -2.99769 | 0.813788 |
| H | -15.1544 | -4.16222 | -0.49763 |
| H | -15.6049 | -2.43983 | -0.71043 |
| O | -13.2193 | 1.594794 | 1.123036 |

---
